# Supplementary material
Source: PubMed Central journal article supplement (PMC2597198)
Supplement: NIHMS67751-supplement-01.pdf [file NIHMS67751-supplement-01.pdf]

**Cell, Volume 134**

**Supplemental Data**

**The Regulation and Evolution of a  
Genetic Switch Controlling Sexually  
Dimorphic Traits in *Drosophila***

Thomas M. Williams, Jane E. Selegue, Thomas Werner, Nicolas Gompel, Artyom Kopp, and Sean B. Carroll

**SUPPLEMENTAL EXPERIMENTAL PROCEDURES**

**Reporter Constructs and Transgenic Fly Production**

Primer combinations used to PCR amplify the sequences analyzed in the *bab* locus screen are provided in Table S1 and combinations used in truncation analysis to determine the minimal-sufficient sequences of the *D. melanogaster* dimorphic and anterior elements are provided in Table S2. The orthologous *D. willistoni* anterior and dimorphic elements were amplified respectively using the primer combinations:

ggtaccTCGAGATGTTGATGGAGAAGGAGA and  
gctagcCTTGGATGTTTTGAATGGTGACCT;  
ggcgcgccCACATAAAAATCAGCAACAAASTTGC and  
cctgcaggGCCACGCCCTYAATCAACTAAGTAA.

Mutations to dimorphic elements were made using the QuickChange Site-Directed Mutagenesis Kit (Stratagene) or by PCR Synthesis by Overlap Extension. The *bab1* intron 4 and intron 5 sequences were cloned into the transformation vector RINheXho (Wittkopp et al., 2002), a derivative of the *hsp70-LacZ* CaSpeR plasmid. All additional sequences involved in the *bab* locus screen, truncation analysis, and the *D. wil* anterior and dimorphic elements (Figure 5) were cloned into a modified version of

the P-element based transformation vector SMG2 (Gompel et al., 2005) that additionally includes the endogenous *bab2* promoter (as suggested by J-L Couderc). Wild-type and mutant versions of the *D. mel.* and *D. wil.* dimorphic elements whose activity was quantitatively assessed in the same transgenic insertion site (Figure 3, Figure 4, Figure 6, and Table S3) were cloned into a modified reporter vector called S3aG. This vector contains the *hsp70* promoter upstream of the GFP gene and a 284 base pair *attB* recombination sequence inserted in the *AvrII* restriction enzyme site of the SMG3 p-element transformation vector (gift from B. Prud'homme). This *attB* sequence was PCR amplified from the *attB*-P[acman] plasmid template (Venken et al., 2006) using the primers cctaggTCGACATGCCCGCCGTGACC and cctaggGTCGACGATGTAGGTCACGGTCTC.

The *D. melanogaster yw* strain was used for p-element mediated transgenesis (injection protocol can be obtained at: <http://www.molbio.wisc.edu/carroll/methods//methods.html>). Site-specific integration of transgenes was accomplished by injecting embryos from flies containing the X-chromosome *attP* docking site VK00046 (Venken et al., 2006) and a genomic  $\phi$ C31-integrase source on chromosome II (gift from F. Karch). The standard injection protocol was varied only by the absence of a helper plasmid in the injection mix for site-specific transgenesis. The activity of all reporter constructs except for *bab1* intron 4 and intron 5 were imaged for EGFP expression. The intron 4 and transgenes activity were assessed by *lacZ* staining. Briefly, samples were fixed for 10 minutes in 1% glutaraldehyde in 10mM NaH<sub>2</sub>PO<sub>4</sub> pH7.0; 150mM NaCl; 1mM MgCl<sub>2</sub>; 0.1% Triton-X. Samples were washed and then stained until ready in 0.1% X-Gal in 10mM NaH<sub>2</sub>PO<sub>4</sub>

pH7.0; 150mM NaCl; 3.3 mM K<sub>4</sub>[Fe(CN)<sub>6</sub>]; 3.3 mM K<sub>3</sub>[Fe(CN)<sub>6</sub>].; 0.1% Triton-X.

Results relevant to this study are reported in Table S1-S3.

### **Annotation of the *bab* Noncoding Sequences**

Scaled representations of the *bab* locus (Figure S1A) and *bab1* (Figure 1E, Figure 3A, and Figure S1B) and their annotation with the surveyed non-coding sequences were produced using the GenePalette software tool (Rebeiz and Posakony, 2004).

### **Protein Production and DNA-Binding Analyses**

The coding sequence for Bab1 amino acids 273-473 (referred to as Bab1 20 kDa) was amplified by PCR from *Canton<sup>S</sup>* genomic DNA using the primers gaattcGCTGAGCTGAGGCTCTCCCCA and gcggccgcTTACTAGCCCCTCCACCACCGCCAT. The coding sequence for the first 106 amino acids containing the DNA-binding domain and common to both DSX<sup>F</sup> and DSX<sup>M</sup> (referred to here after as DSX DBD) was PCR amplified from a cDNA containing plasmid using the primers ggatccATGGTTTCGGAGGAGAACTGGAA and ctcgagTTACTACACCTCGTGCATGTGCAGCG. Each of these regions were cloned into the pGEX4-T1 protein expression vector (Pharmacia-Amersham) using the restriction enzyme site combinations EcoRI /NotI and BamHI /XhoI respectively.

GST-Bab1 20kDa, GST-Dsx DBD and GST-AbdB HD (Jeong et al., 2006) fusion proteins were purified from the BL21 Lys S *E. coli* strain as described previously (Williams et al., 1995) and purified using glutathione-agarose according to the

manufacture's protocol (Pharmacia-Amersham). DNaseI footprinting reactions and EMSAs were performed in 1X footprinting buffer as previously described (Jeong et al., 2006) with the following modifications; annealed oligonucleotide probes for EMSAs had 5' T-overhangs that were end-filled with [ $\alpha$ - $^{32}$ P] dATP using the Klenow fragment (Roche). EMSA binding reactions were performed without poly(dI-dC). PAGE-purified oligonucleotides for EMSAs are listed in Table S4.

### **Antibody Production**

Rabbits were immunized with purified GST-Bab1 20 kDa recombinant protein (21<sup>st</sup> Century Biochemicals) and collected serum was affinity-purified using a GST-Bab1 20 kDa protein column. GST-reactive antibodies were depleted using a GST-only protein column (Williams et al., 1995).

### **Sequence Analysis of Orthologous Dimorphic Elements**

Sequences for *D. erecta*, *D. willistoni*, *D. virilis*, and *D. grimshawi* were obtained from their respective genome databases. All other sequences were obtained by cloning and sequencing of orthologous sequences using genomic DNA prepared from species stocks obtained from the Tucson *Drosophila* stock center. The primer combination used to PCR amplify the sequences from *D. saltans*, *Z. vittiger*, and *D. tripunctata* were CACATAAAAATCAGCAACAAASTTGC and GCCACGCCCTYAATCAACTAAGTAA, which does not include the binding site 14 region. All other sequences were amplified by the primer combination CACATAAAAATCAGCAACAAASTTGC and CAAAACKGRCATAAAAMSAAATTACA, which includes the binding site 14 region.

Novel sequences have been deposited in GenBank as follows: *D. melanogaster* Canton<sup>S</sup> strain (EU835207), *D. mauritiana* (EU835206), *D. fuyamai* (EU835205), *D. auraria* (EU835204), *D. obscura* (EU835203), *D. saltans* (EU835202), *Z. ghesquierei* (EU835201), *Z. vittiger* (EU835208), *D. tripunctata* (EU835209). Orthologous sequences were aligned using CHAOS + DIALIGN (Brudno et al., 2004) with subsequent manual alignment in problematic regions.

### **Measurement of Relative Fluorescence Intensity**

The relative fluorescence intensities for GFP-reporter expression in segment A6 were determined as previously described (Jeong et al., 2008) with the following modifications. All transgenic constructs compared were integrated into the same genomic site to eliminate variation due to site of integration. For each transgene, a representative line was chosen for quantification based on a prior qualitative survey of multiple independent lines. All lines were measured on the same confocal microscope over a short time interval to reduce differences in measurements due to the microscope. Using transgenic female pupae containing the wild-type dimorphic element GFP-reporter transgene, the optimal confocal settings were determined as those that gave the brightest image with the fewest saturated pixels in segment A6. Mean fluorescent intensity of segment A6 for each image was calculated as the mean intensity measured for segment A6 minus the mean intensity of segment A3 (background correction). For each construct, the mean value for A6 intensity and standard error of the mean was calculated using images from multiple independent samples from the same transgenic line (n of 2-5, Table S3). The percent of wild-type activity was calculated as:

(experimental A6 mean/A6 mean of wild-type dimorphic element in female pupae) X 100. In our experience using the *attP* line VK00046 (referred to as X-out), we found that the activity and variation between transgenic lines is not consistently or significantly greater than that of individuals from the same line. For example, for three independent lines of the transgenic construct mel 14 KO, the % wild type activity and SEM was determined as 55%±0 (line 1), 56%±1 (line 2) and 54%±1 (line 3), while the between line comparison gave 55.7%±1 (line 1 vs. 2), 54.7%±0 (line 1 vs. 3) and 55.2%±1 (line 2 vs. 3).

## SUPPLEMENTAL REFERENCES

Brudno, M., Steinkamp, R., and Morgenstern, B. (2004). The CHAOS/DIALIGN WWW server for multiple alignment of genomic sequences. *Nucleic Acids Res* 32, W41-44.

Gompel, N., Prud'homme, B., Wittkopp, P. J., Kassner, V. A., and Carroll, S. B. (2005). Chance caught on the wing: cis-regulatory evolution and the origin of pigment patterns in *Drosophila*. *Nature* 433, 481-487.

Jeong, S., Rebeiz, M., Andolfatto, P., Werner, T., True, J., and Carroll, S. B. (2008). The evolution of gene regulation underlies a morphological difference between two *Drosophila* sister species. *Cell* 132, 783-793.

Jeong, S., Rokas, A., and Carroll, S. B. (2006). Regulation of body pigmentation by the Abdominal-B Hox protein and its gain and loss in *Drosophila* evolution. *Cell* 125, 1387-1399.

Rebeiz, M., and Posakony, J. W. (2004). GenePalette: a universal software tool for genome sequence visualization and analysis. *Dev Biol* 271, 431-438.

Venken, K. J., He, Y., Hoskins, R. A., and Bellen, H. J. (2006). P[acman]: a BAC transgenic platform for targeted insertion of large DNA fragments in *D. melanogaster*. *Science* 314, 1747-1751.

Williams, J. A., Langeland, J. A., Thalley, B. S., Skeath, J. B., and Carroll, S. B. (1995). Expression of foreign proteins in *E. coli* using plasmid vectors and purification of specific polyclonal antibodies. In *DNA Cloning 2 Expression Systems*, D. M. a. H. B. D. Glover, ed. (Oxford, Oxford University Press).

Wittkopp, P. J., Vaccaro, K., and Carroll, S. B. (2002). Evolution of yellow gene regulation and pigmentation in *Drosophila*. *Curr Biol* 12, 1547-1556.

**Figure S1. Screen of the *bab* locus for pupal cis-regulatory elements (CREs) active in pupae.**

(A) The *D. melanogaster* *bab* locus consists of the tandemly duplicated genes *bab1* and *bab2* which are located between the adjacent genes *trio* and *CG13912* (red). Numbers and adjacent bars indicate the *bab* locus region surveyed in a given reporter construct. Within the *bab* locus, the only non-coding sequences that were not tested for CRE activity were those that consisted of sequences derived from a *ROO* and a *mdg* transposable element and sequences between the 1st exon of *trio* and the *mdg* element. (B) To scale representation of the informative truncated GFP-reporter constructs tested that identified the minimal sufficient sequences of the dimorphic and anterior elements. The screen of the *bab* locus identified CREs regulating expression in abdominal oenocytes (C; 4); leg tarsal segments (D; 10); abdominal bristle and longitudinal muscle cells (E; 28). The red arrow points to a representative longitudinal muscle expressing GFP. The first 15 kb of the *bab1* intron drove dimorphic reporter expression in the pupal abdominal epidermis, with expression in males limited to segments A2-A4 (F; 17), while females had also expressed the reporter in posterior segments A5-A7 (G; 17). This dimorphic pattern is mediated by the anterior element (32) that drives monomorphic expression in segments A2-A4 (H) and the dimorphic element (23) that drives female-specific expression in A5-A7 (I). Additional information on the numbered GFP-reporter gene constructs can be found in Table S1 and Table S2.



**Figure S2. DNase I footprinting analysis of the dimorphic element identifies multiple sites bound by ABD-B**

DNase I footprinting analysis on the *D. melanogaster* dimorphic element determined that of the 14 ABD-B consensus sites, all but sites 9 and 10 were appreciably bound by ABD-B HD protein. Amounts of each protein used were as follows: lane 1, 1000 ng GST only; lane 2, no protein; lane 3, 64 ng ABD-B HD; lane 4, 160 ng ABD-B HD; lane 5, 400 ng ABD-B HD; lane 6, 1,000 ng ABD-B HD. A G+A sequencing ladder is included in lane L. The location of the 14 consensus binding sites are indicated by a black rectangle with the site's number adjacent to it. The additional TTAT motifs (non-TTTAT) are indicated by black rectangles with an adjacent "t".

**Figure S3. Direct binding of ABD-B to multiple sites within the dimorphic element.**

EMSA were performed separately on annealed oligonucleotide probes containing the wild-type and mutant (KO) ABD-B putative binding sites 4, 8, 13 and 14 (see text) with increasing amounts of ABD-B HD protein (from left to right: 0 ng, 16 ng, 62 ng, 250 ng, and 1,000 ng). For probes containing the wild-type binding sites 8 (lanes 1-5), 13 (lanes 11-15), 14 (lanes 21-25), and 4 (lanes 31-35), as the amount of ABD-B HD protein increased a correlative increase in the amount of probe bound was observed. Protein binding was strongly reduced when sites 8 (lanes 6-10), and 14 (lanes 26-30) were mutated, and completely abolished when site 4 (lanes 36-40) was mutated. Compared to sites 4, 8 and 14, site 13 (lanes 11-15) was not bound as efficiently by the ABD-B HD and mutation of the site (lanes 16-20) resulted in a smaller decrease in binding.

**Figure S4. The Dsx1 site of *D. willistoni* is of the same affinity but opposite polarity to the Dsx1 site of *D. melanogaster*.**

EMSA comparing the ability of DSX to bind annealed oligonucleotide probes containing the *D. mel.* Dsx site 1 (Dsx1 WT; lanes 1-5), a mutated version of Dsx site 1 (Dsx1 KO; lanes 6-10), and the Dsx site 1 of *D. wil.* (Dsx1 wil; lanes 11-15). For each probe, binding reactions were performed using increasing amounts of the DSX DBD protein (from left to right: 0 ng, 16 ng, 62 ng, 250 ng, and 1,000 ng). In contrast to the mutant probe (lanes 6-10) where DSX binding was reduced >16-fold, the *D. wil.* binding site (lanes 11-15) was bound as efficiently by DSX as the *D. mel.* site. Blue arrowhead points to the location on gel of complex between the probe and a single DSX DBD monomer, and the red arrow indicates location of a complex containing probe bound by two monomers. Below the respective lanes for each probe are the sequences of the binding sites tested. Red bases indicated those changed in the Dsx1 KO probe and blue bases are the changes made in the Dsx1 wil probe.

**Figure S5. Alignment of orthologous sequences containing dimorphic elements.**

Sequences containing the dimorphic elements from 12 species from the genus *Drosophila* were aligned and annotated with relevant features. Species included are: *D. melanogaster* (*D. mel.*), *D. mauritiana* (*D. mau.*), *D. simulans* (*D. sim.*), *D. erecta* (*D. ere.*), *D. fuyamai* (*D. fuy.*), *D. auraria* (*D. aur.*), from the *melanogaster* species group of the subgenus *Sophophora*; *D. obscura* (*D. obs.*), *D. willistoni* (*D. wil.*), *D. saltans* (*D. sal.*) from the *obscura*, *willistoni*, and *saltans* species group of the subgenus *Sophophora*; and the non-*Sophophoran* species *Zaprionus ghesquierei* (*Z. ghe.*), *D. virilis* (*D. vir.*), *D.*

*grimshawi* (D. gri). Additionally, the Dsx1 sites of the non-Sophophoran *D. tripunctata* (D. tri), and *Zaprionus vittiger* (Z. vit) were added to the alignment which indicates that the ancestral orientation of this site in the common ancestor of *Sophophora*, and the Dsx site 2 of Z. vit was added to indicate that this site predates the common ancestor of *Sophophora*. The additional TTAT sites in the D. mel dimorphic element are bolded in brown and indicated below the alignment by “t”. Regions I, II, III of increased spacing in D. wil are underlined and the region where these sequences were inserted in D. mel are indicated below the alignment by the adjacent “□” below the alignment. Binding sites 1-14 are indicated in bolded red letters and annotated below the alignment. The nucleotides adjacent to site 14 are in blue which confirm the sites orthology in otherwise poorly conserved sequences. Dsx sites 1 and 2 are bolded in blue (yellow when the polarity is inverted) and annotated below the alignment.

Figure S1

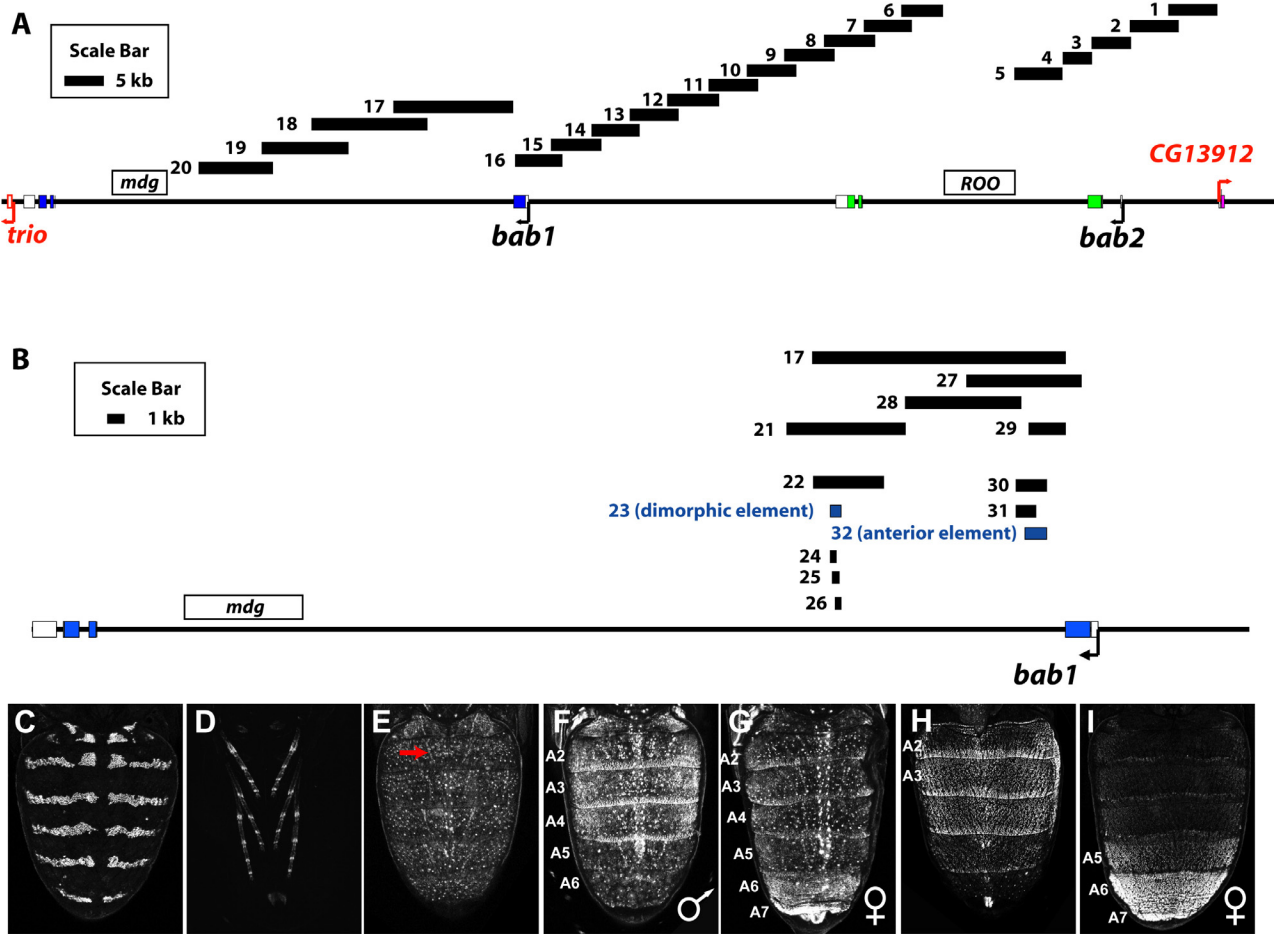

Figure S2

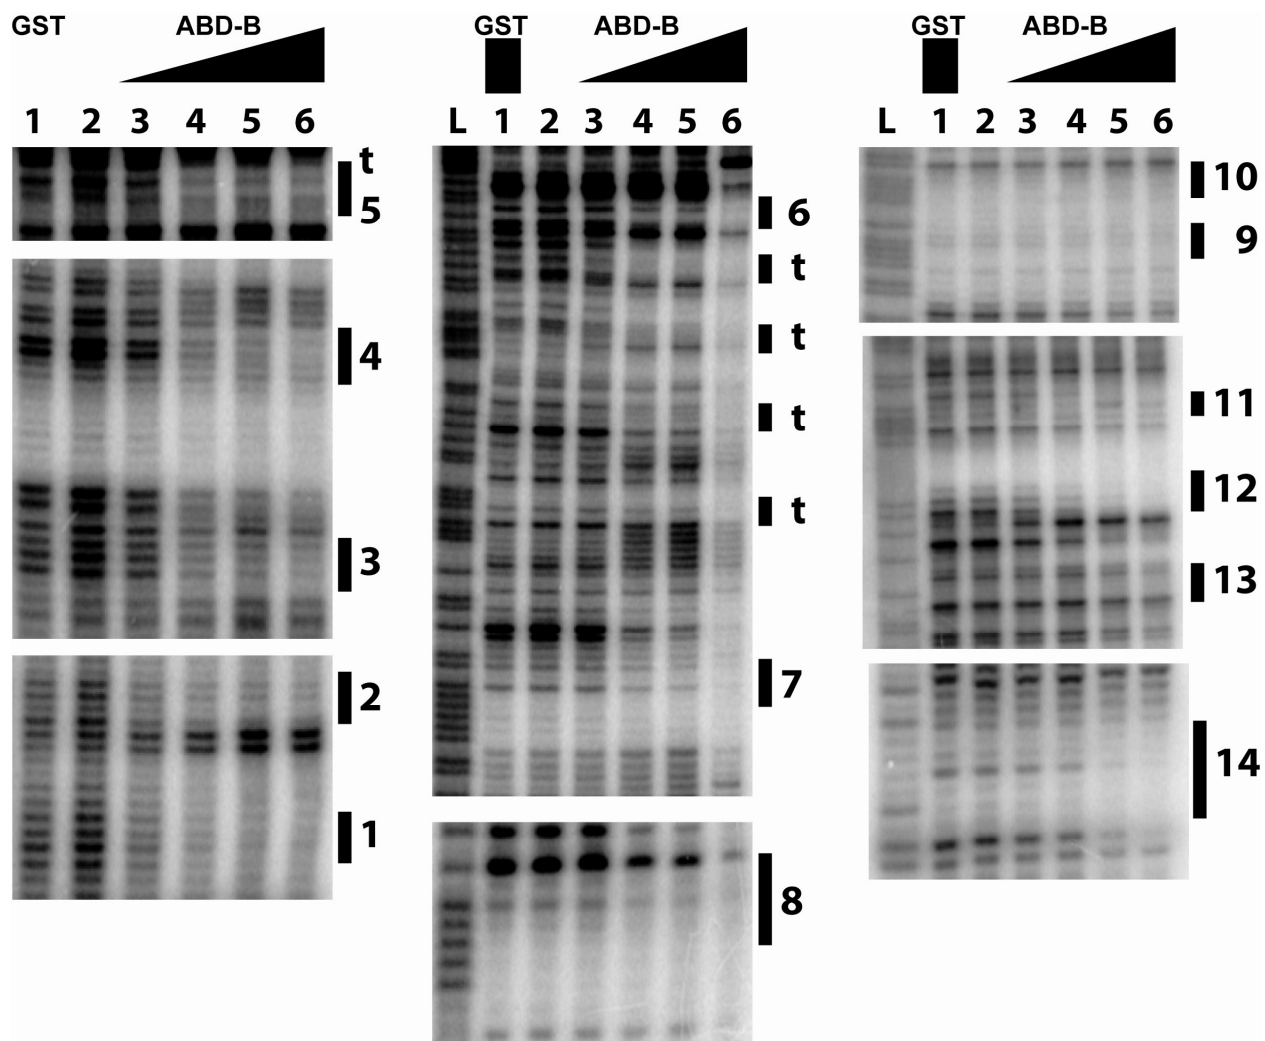

Figure S3

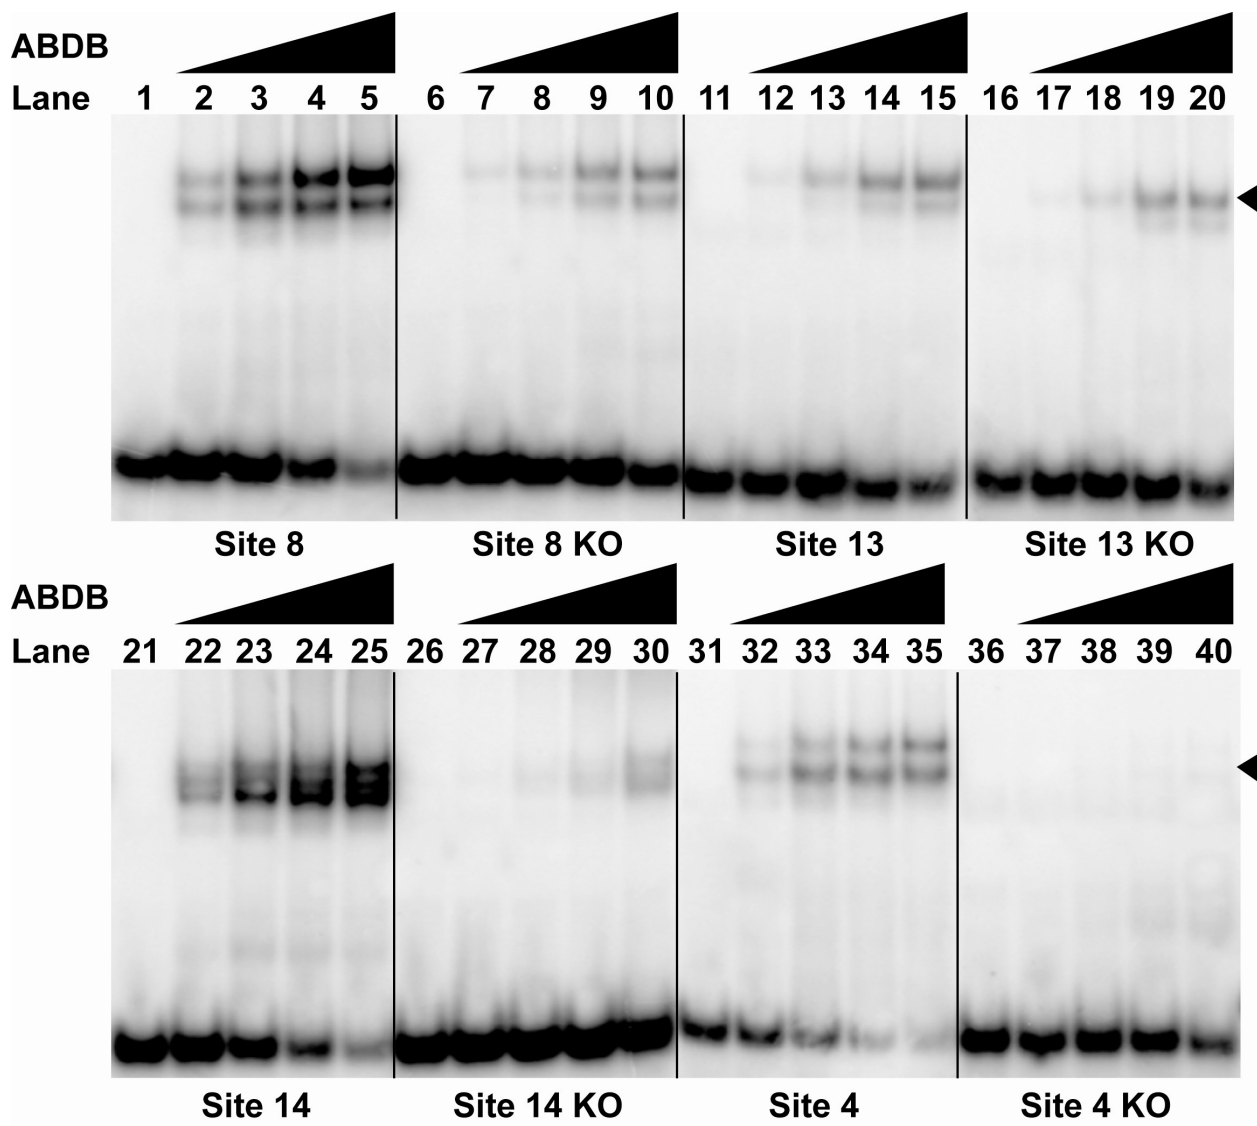



**Figure S5**

|       |                   |                   |                     |            |            |
|-------|-------------------|-------------------|---------------------|------------|------------|
| D.mel | CACATAAAAA        | TCAGCAACAA        | AG <b>TTGCT</b> CTG | G-----CCC  | CATAAAAGAT |
| D.mau | CACATAAAAA        | TCAGCAACAA        | AGTTGCCCTG          | G-----CCC  | CATAAAAGAT |
| D.sim | CACATAAAAA        | TCAGCAACAA        | A-TTGCCCTG          | G-----CCC  | CATAAAAGAT |
| D.ere | CACATAAAAA        | TCAGCAACAA        | ACTTGCCCTG          | G-----TCC  | CATAAAAAAT |
| D.fuy | CACATAAAAA        | TCAGCAACAA        | AGTTGCCCTG          | G-----CCC  | CATAAAAAAT |
| D.aur | CACATAAAAA        | TCAGCAACAA        | AGTTGCCCTG          | G-----CCC  | CATAAAAAAT |
| D.obs | CACATAAAAA        | TCAGCAACAA        | ACTTGCCaac          | tggaaaaCCC | CATAAAAAAT |
| D.wil | <b>CACATAAAAA</b> | <b>TCAGCAACAA</b> | <b>ACTTGCGCCT</b>   | -----      | CATAAAAAAA |
| D.sal | CACATAAAAA        | TCAGCAACAA        | ACTTGCGCCT          | -----      | CATAAAAAAA |
| Z.ghe | CACATAAAAA        | TCAGCAACAA        | AGTTGCGGCT          | -----      | CATAAAAAAT |
| D.vir | CACATAAAAA        | TCAGCAACAA        | AGTTGCGGCT          | -----      | CATAAAAAAT |
| D.gri | CACATAAAAA        | TCAGCAACAA        | AGTTGCGGCT          | -----      | CATAAAAAAT |

**(Dimorphic element wil Fwd Primer)>**

|       |            |            |            |            |            |
|-------|------------|------------|------------|------------|------------|
| D.mel | TGCAAACAAA | AACAGAACA- | -ACAGAA--- | -----      | -----      |
| D.mau | TGCAAACAAA | AACAGAACA- | -ACAGAA--- | -----      | -----      |
| D.sim | TGCAAACAAA | AACAGA--AC | AACAGAA--- | -----      | -----      |
| D.ere | TGCAAACAAA | AACAGA--AC | aacagaa--- | -----      | -----      |
| D.fuy | TGCAAACAAA | AAGAGA--AC | Aac--AA--- | -----      | -----      |
| D.aur | TGCTAACAAA | aaaggagaAC | AACAGAA--- | -----      | -----      |
| D.obs | TGCAtttaca | tctgagaaaa | aaaaaaacac | acacacaaga | aataaaagcc |
| D.wil | ATTGC----- | -----      | -----      | -----      | ---ACAAAAA |
| D.sal | ATTGC----- | -----      | -----      | -----      | ---ACAAAAA |
| Z.ghe | TGCGCACAAA | TAAAAAACAA | cagcaacacc | aacaacaaca | aaaACAAAAA |
| D.vir | TGCGCACAAA | TAAAAAACAA | caaca----- | -----      | -----      |
| D.gri | TGCGCACAAA | TAAAAAaaa  | taaaaaata  | acaacaaca  | caagaacaag |

|       |            |            |            |            |            |
|-------|------------|------------|------------|------------|------------|
| D.mel | -----      | -----      | -----      | -----      | -----      |
| D.mau | -----      | -----      | -----      | -----      | -----      |
| D.sim | -----      | -----      | -----      | -----      | -----      |
| D.ere | -----      | -----      | -----      | -----      | -----      |
| D.fuy | -----      | -----      | -----      | -----      | -----      |
| D.aur | -----      | -----      | -----      | -----      | -----      |
| D.obs | aaatgtaaag | aaacgaggtg | gagatactct | tttaaagggc | atttgttatg |
| D.wil | CA-----AA  | A-----     | -----      | -----      | -----      |
| D.sal | CA-----AA  | A-----     | -----      | -----      | -----      |
| Z.ghe | CA-----AA  | A-----     | -----      | -----      | -----      |
| D.vir | -A-----AA  | A-----     | -----      | -----      | -----      |
| D.gri | aacaacataA | A-----     | -----      | -----      | -----      |

|       |       |       |       |       |       |
|-------|-------|-------|-------|-------|-------|
| D.mel | ----- | ----- | ----- | ----- | ----- |
| D.mau | ----- | ----- | ----- | ----- | ----- |
| D.sim | ----- | ----- | ----- | ----- | ----- |
| D.ere | ----- | ----- | ----- | ----- | ----- |
| D.fuy | ----- | ----- | ----- | ----- | ----- |



D.aur -----  
D.obs gtttgtaggt catatatact gagccattct taatggatgc caaagctaca  
D.wil -----  
D.sal -----  
Z.ghe -----  
D.vir -----  
D.gri -----

D.mel -----  
D.mau -----  
D.sim -----  
D.ere -----  
D.fuy -----  
D.aur -----  
D.obs atcttcacag ttctattagc aaaatatcag aatttgggga ttaatctccc  
D.wil -----  
D.sal -----  
Z.ghe -----  
D.vir -----  
D.gri -----

D.mel -----  
D.mau -----  
D.sim -----  
D.ere -----  
D.fuy -----  
D.aur -----  
D.obs aatttctccc ttaaaattcc tccctttcac tcaggagaac atttttaaca  
D.wil -----  
D.sal -----  
Z.ghe -----  
D.vir -----  
D.gri -----

D.mel -----  
D.mau -----  
D.sim -----  
D.ere -----  
D.fuy -----  
D.aur -----  
D.obs gaacaaaaaa aaaacagtaa ctaattcagc gacaattatt tcgaatgtgt  
D.wil -----  
D.sal -----  
Z.ghe -----  
D.vir -----  
D.gri -----

|       |             |            |            |            |            |
|-------|-------------|------------|------------|------------|------------|
| D.mel | -----       | -----      | -----      | -----      | -----      |
| D.mau | -----       | -----      | -----      | -----      | -----      |
| D.sim | -----       | -----      | -----      | -----      | -----      |
| D.ere | -----       | -----      | -----      | -----      | -----      |
| D.fuy | -----       | -----      | -----      | -----      | -----      |
| D.aur | -----       | -----      | -----      | -----      | -----      |
| D.obs | gttgccccatg | gcacaggtga | agccatggcc | tatacaaacc | cataatcgaa |
| D.wil | -----       | -----      | -----      | -----      | -----      |
| D.sal | -----       | -----      | -----      | -----      | -----      |
| Z.ghe | -----       | -----      | -----      | -----      | -----      |
| D.vir | -----       | -----      | -----      | -----      | -----      |
| D.gri | -----       | -----      | -----      | -----      | -----      |

|       |            |            |            |            |             |
|-------|------------|------------|------------|------------|-------------|
| D.mel | -----      | -----      | -----      | -----      | ----TGGCAT  |
| D.mau | -----      | -----      | -----      | -----      | ----TGGCAT  |
| D.sim | -----      | -----      | -----      | -----      | ----TGGCAT  |
| D.ere | -----      | -----      | -----      | -----      | ----TGGCGT  |
| D.fuy | -----      | -----      | -----      | -----      | ----TGGCAT  |
| D.aur | -----      | -----      | -----      | -----      | ----TGGCAT  |
| D.obs | actcggtaca | gggtaccgaa | tagatgcaac | aacagacaga | attgTGGCAT  |
| D.wil | -----      | -----      | -----      | -----      | ----TGGCAT  |
| D.sal | -----      | -----      | -----      | -----      | ----TGGCAT  |
| Z.ghe | -----      | -----      | -----      | -----      | ----TGG AAT |
| D.vir | -----      | -----      | -----      | -----      | ----TGGCAT  |
| D.gri | -----      | -----      | -----      | -----      | ----TGGCAT  |

|       |            |            |            |            |            |
|-------|------------|------------|------------|------------|------------|
| D.mel | GGAATAAAAT | TTATATGAAT | AACAAAAAGC | AGCTAAAGCA | ----AGC--- |
| D.mau | GGAATAAAAT | TTATATGAAT | AACAAAAAGC | AGCTAAAGCA | ----AGC--- |
| D.sim | GGAATAAAAT | TTATATGAAT | AACAAAAAGC | AGCTAAAGCA | ----AGC--- |
| D.ere | GGAATAAAAT | TTATATGAAT | AACAAAAAGC | AGCTACAGCA | ----AGC--- |
| D.fuy | GGAATAAAAT | TTATATGAAT | AACAAAAAGC | AGCTAAAaga | -AACAGC--- |
| D.aur | GGAATAAAAT | TTATATGAAT | AACAAAAGCA | GCAGTA---- | -----GT--- |
| D.obs | GGAATAAAAT | TTATATGAAT | AACAAAAAc  | gccaacgaga | agcatcagca |
| D.wil | GAAATAAAAT | TTATATGAAT | AACAAAAAGG | CAGGCA--AA | CACCAGG--- |
| D.sal | GAAATAAAAT | TTATATGAAT | AACAAAAAGG | CAGGCA--AA | CACCAGC--- |
| Z.ghe | GAAATAAAAT | TTATATGAAT | AACAACAAaa | gcaacaacAA | GAACAAG--- |
| D.vir | GAAATAAAAT | TTATATGAAT | AACAAAAACA | GCAGCA---- | -----AC--- |
| D.gri | GAAATAAAAT | TTATATGAAT | AACAAAAGCA | acaaaaagca | agaacaacta |

|       |            |            |            |            |            |
|-------|------------|------------|------------|------------|------------|
| D.mel | -----      | AGCAACAACA | ATAGTTTACT | GCCCCGGCTC | AGCGGTACAC |
| D.mau | -----      | AGCAACAACA | ACAGTTTACT | GCCCCGGCTC | AGAGGTACAC |
| D.sim | -----      | AGCAACAACA | ACAGTTTACT | GCCCCGGCTC | AGAGGTACAC |
| D.ere | -----      | GGCAACAACA | ACAGTTTACT | GCCTCGTCTC | AGAGGTACAC |
| D.fuy | -----      | AGCAACAACA | ACAGTTTACT | GCTCTGGCTC | AGCAGTACAC |
| D.aur | -----      | AGCAACAACA | acagTTTACG | GCCCTGGCTC | AACAGTACAC |
| D.obs | acgggatggg | GGCAAGAACA | ACAGTTTACT | GCCACGGaaa | gtacttccca |
| D.wil | -----      | AACAACAAA- | -CAGTTTACT | ACTGCTCAGA | AGAGAATGCA |

|       |            |             |            |             |             |
|-------|------------|-------------|------------|-------------|-------------|
| D.sal | -----      | AACAACAAAA  | ACAGTTTACT | ACTGCTCAGA  | AGAGAATGCA  |
| Z.ghe | -----      | AGCAAGAACA  | ACAGTTTACG | GCgttgaagg  | caaatgatg   |
| D.vir | -----      | AACAACAACA  | ACAaaaggca | caaacagatg  | aagc-----   |
| D.gri | caagaaga-- | -----       | -----      | -----       | -----       |
| D.mel | TGTGCAAAAC | G-TTGTACTC  | CTCCTCAT-- | -----       | -----       |
| D.mau | TGAGCAAAAT | GAaTGTACTC  | TTTTTCAT-- | -----       | -----       |
| D.sim | TGAGCAAAAT | GATTGTGCTC  | CTCCTCAT-- | -----       | -----       |
| D.ere | TGTACGAAAT | A-TTCgtact  | ctcaaaatac | aaagtgctct  | ctaccatcga  |
| D.fuy | TGTGGAAAAT | A-TTGatacc  | attctttttt | atatccataa  | taaaggccaa  |
| D.aur | AGAGagaaaa | aatattcacg  | acttttctta | gacaaaatta  | tattagtttg  |
| D.obs | c---GAGAGA | GGGAGAGAGA  | TATGGAGAGA | Gaatgcatct  | ca-----     |
| D.wil | Acacca---- | ---GCAACAA  | CAACAACAAC | AACAGCAACA  | ACTACAACAA  |
| D.sal | Acaccagcaa | acaACAATAA  | CAACAAGAAC | AGCAGCAGTA  | GAAACAACAA  |
| Z.ghe | gtgaGAGAAA | AGGAGAGACA  | GAGAGAGAGA | Gctgagaatg  | catcgttg--  |
| D.vir | -----      | -----       | -----      | -----       | -----       |
| D.gri | -----      | -----       | -----      | -----       | -----       |
|       |            |             |            |             |             |
| D.mel | -----      | -----       | -----      | -----       | -----       |
| D.mau | -----      | -----       | -----      | -----       | -----       |
| D.sim | -----      | -----       | -----      | -----       | -----       |
| D.ere | atataaacat | agata-----  | -----      | -----       | -----       |
| D.fuy | tagagtatth | ttactgcatg  | atagtatttg | ggagctcata  | atthgtaaac  |
| D.aur | atgtagaaaa | atthtttggtg | tttaatatct | ttgtatatat  | atggtthtta  |
| D.obs | -----      | -----       | -----      | -----       | -----       |
| D.wil | CAGCAACAgc | -----       | -----TT    | GTTGCAACTA  | GAGTAGAAGT  |
| D.sal | CAGCAGCAgc | agcagcagca  | gcagcagcTT | GTTGCAACTA  | GAGTAGAAGT  |
| Z.ghe | -----      | -----       | -----      | -----       | -----       |
| D.vir | -----      | -----       | -----      | -----       | -----       |
| D.gri | -----      | -----       | -----      | -----       | ----AGAAGA  |
|       |            |             |            |             |             |
| D.mel | -----      | -----       | -----      | -----       | -----       |
| D.mau | -----      | -----       | -----      | -----       | -----       |
| D.sim | -----      | -----       | -----      | -----       | -----       |
| D.ere | -----      | -----       | -----      | -----       | -----       |
| D.fuy | tgaaaacaag | tttgcttttg  | ttctttaggg | aagaaaaaaa  | ggagctthta  |
| D.aur | ttthgtaaga | aagtggthtt  | taaagacgca | ataaatctta  | agthccctt-- |
| D.obs | -----      | -----       | -----      | -----       | -----       |
| D.wil | AGTAGAAAAA | GAAGCAGAAG  | AAGAGAAGTT | GCAGCATtctg | ctgthgcccgc |
| D.sal | Atgtaaaagt | g-----G     | AAGAAAAGTT | GCAGCAT---  | -----       |
| Z.ghe | -----      | -----       | -----      | -----       | -----       |
| D.vir | -----      | -AAGAGGAAG  | AACAGTTTAC | TGCTCTGCA-  | -----       |
| D.gri | TGGAGAAGAA | GAAGATGAAA  | AACAGTTTAC | TGCTCTGCAC  | tctcggagaa  |
|       |            |             |            |             |             |
| D.mel | -----      | -----       | -----      | -----       | -----       |
| D.mau | -----      | -----       | -----      | -----       | -----       |
| D.sim | -----      | -----       | -----      | -----       | -----       |
| D.ere | -----      | -----       | -----      | -----       | -----       |

|       |            |            |            |            |            |
|-------|------------|------------|------------|------------|------------|
| D.fuy | aattttaa   | atcattgcc  | ttagaacagg | aaaaactact | taatatttgt |
| D.aur | -----      | -----      | -----      | -----      | -----      |
| D.obs | -----      | -----      | -----      | -----      | -----      |
| D.wil | ttttgctgcT | GCTGCTGC-- | -----      | -----      | -----      |
| D.sal | -----T     | GCTGCTGC-- | -----      | -----      | -----      |
| Z.ghe | -----      | -----      | -----C-    | -----      | -----      |
| D.vir | -----      | -----      | -----      | -----      | -----      |
| D.gri | tgcaatgcga | aacgttcggt | gcaacaaaC- | -----      | -----      |

|       |            |            |            |            |            |
|-------|------------|------------|------------|------------|------------|
| D.mel | -----      | -----      | -----      | -----      | -----      |
| D.mau | -----      | -----      | -----      | -----      | -----      |
| D.sim | -----      | -----      | -----      | -----      | -----      |
| D.ere | -----      | -----      | -----      | -----      | -----      |
| D.fuy | taagccttaa | ataaaataaa | tacaaattta | ttccaatgca | aaaatacatg |
| D.aur | -----      | -----      | -----      | -----      | -----      |
| D.obs | -----      | -----      | -----      | -----      | -----      |
| D.wil | -----      | -----      | -----      | -----      | -----      |
| D.sal | -----      | -----      | -----      | -----      | -----      |
| Z.ghe | -----      | -----      | -----      | -----      | -----      |
| D.vir | -----      | -----      | -----      | -----      | -----      |
| D.gri | -----      | -----      | -----      | -----      | -----      |

|       |            |            |            |            |            |
|-------|------------|------------|------------|------------|------------|
| D.mel | -----      | -----      | -----      | -----      | ----AATAAT |
| D.mau | -----      | -----      | -----      | -----      | ----ACCAAT |
| D.sim | -----      | -----      | -----      | -----      | ----ACCAAT |
| D.ere | -----      | -----      | -----      | -----      | -----      |
| D.fuy | tttttttatt | caaaaaaagg | cttaactaaa | ctttctgaac | gtgaAACAAT |
| D.aur | -----      | -----      | -----      | -----      | -----      |
| D.obs | -----      | -----      | -----      | -----      | -----      |
| D.wil | -----      | -----      | -----      | -----      | -----      |
| D.sal | -----      | -----      | -----      | -----      | -----      |
| Z.ghe | -----      | -----      | -----      | -----      | -----      |
| D.vir | -----      | -----      | -----      | -----      | -----      |
| D.gri | -----      | -----      | -----      | -----      | -----      |

|       |            |            |            |            |             |
|-------|------------|------------|------------|------------|-------------|
| D.mel | ATGAGTA--- | -----      | ----TATAGA | GTATATAATA | TACTATATAT  |
| D.mau | AACaggaagt | agtTAATATG | AAAGTATAAA | GTAAATATCA | TACTATATAT  |
| D.sim | AACT-----  | ---TAATATA | AAAGTATAAA | GTAAATAACC | TACCATATAT  |
| D.ere | AACA-----  | ---TAATATG | AATGTATAAA | CTGAAGgact | tgccaggcttt |
| D.fuy | ATTACTA--- | -----      | ----ACTAGG | GTATGTACTA | aatataattt  |
| D.aur | -----      | -----      | -AAATATAAA | TAAAATATTA | TTCAATATag  |
| D.obs | -----      | -----      | -----      | -----      | -----       |
| D.wil | -----      | -----      | -----      | -----      | -----       |
| D.sal | -----      | -----      | -----      | -----      | -----       |
| Z.ghe | -----      | -----      | -----      | -----      | -----       |
| D.vir | -----      | -----      | -----      | -----      | -----       |
| D.gri | -----      | -----      | -----      | -----      | -----       |

|       |             |            |            |            |            |
|-------|-------------|------------|------------|------------|------------|
| D.mel | CTCcattgat  | aatttcgatc | attttcacct | tttaactaat | ttatgccc   |
| D.mau | CTCTATAGAT  | AGTTTCATCa | ccttTTTTTC | ACCTAATTTA | TATCCATTA- |
| D.sim | CTCTATAGAT  | AGTTTCATCt | ----TTTTCA | ACCTTATTTA | TGTCCATTAA |
| D.ere | gtaaataatta | agtactacat | tgtagATTAT | ATAGATTATT | TCAATTTCTt |
| D.fuy | gtataaaatc  | tggccaaaag | caatgcaa   | tttttgTAGT | GTA-----   |
| D.aur | tatttaa     | ttaatacat- | -----ATTTT | TTATATTATT | TTAATTACTa |
| D.obs | -----       | -----      | -----      | -----      | -----      |
| D.wil | -----       | -----      | -----      | -----      | -----      |
| D.sal | -----       | -----      | -----      | -----      | -----      |
| Z.ghe | -----       | -----      | -----      | -----      | -----      |
| D.vir | -----       | -----      | -----      | -----TAGT  | ATA-----   |
| D.gri | -----       | -----      | -----      | -----      | -----      |

|       |            |            |            |            |       |
|-------|------------|------------|------------|------------|-------|
| D.mel | tatagTTGCA | -----      | -----T---  | -----      | ----- |
| D.mau | -----      | -----      | -----      | -----      | ----- |
| D.sim | aa---TTGCA | -----      | -----T---  | -----      | ----- |
| D.ere | ttagaaaata | tctgtccagc | acaaatT--- | -----      | ----- |
| D.fuy | -----      | -----      | -----      | -----      | ----- |
| D.aur | atttgtg    | tacttttcac | agaggcagtc | agaaaagggc | tgcc  |
| D.obs | -----      | -----      | -----      | -----      | ----- |
| D.wil | -----      | -----      | -----      | -----      | ----- |
| D.sal | -----      | -----      | -----      | -----      | ----- |
| Z.ghe | -----      | -----      | -----      | -----      | ----- |
| D.vir | -----      | -----      | -----      | -----      | ----- |
| D.gri | -----      | -----      | -----      | -----      | ----- |

|       |            |            |            |            |            |
|-------|------------|------------|------------|------------|------------|
| D.mel | -----      | -----      | -----      | -----      | -----      |
| D.mau | -----      | -----      | -----      | -----      | -----      |
| D.sim | -----      | -----      | -----      | -----      | -----      |
| D.ere | -----      | -----      | -----      | -----      | -----      |
| D.fuy | -----      | -----      | -----      | -----      | -----      |
| D.aur | gcaaactttg | attaacattt | taaggtattt | caggaatcct | tttaacaaga |
| D.obs | -----      | -----      | -----      | -----      | -----      |
| D.wil | -----      | -----      | -----      | -----      | -----      |
| D.sal | -----      | -----      | -----      | -----      | -----      |
| Z.ghe | -----      | -----      | -----      | -----      | -----      |
| D.vir | -----      | -----      | -----      | -----      | -----      |
| D.gri | -----      | -----      | -----      | -----      | -----      |

|       |            |            |            |            |            |
|-------|------------|------------|------------|------------|------------|
| D.mel | -----      | -----T     | TCTCTGAGTG | TGCAGTAAGT | GCCCCAGAAT |
| D.mau | -----      | -----AAT   | TCTCTGAGTG | TGCAGTAAGT | GCCCCAGAAT |
| D.sim | -----      | -----T     | TCTCTGAGTG | TGCAGTAAGT | GCCCCAGAAT |
| D.ere | -----      | -----T     | TCTCTATCTG | TGCAGTAAGT | GCCCCAGAAT |
| D.fuy | -----      | -----      | -----      | --CAGTAAGT | GCCCAAGAAT |
| D.aur | taaaataata | tgctaagAAT | TCTTTCAGTG | CCAAGTAAGT | GCCCgg---- |
| D.obs | -----      | -----      | -----      | -----      | -----      |

|       |       |       |       |            |            |
|-------|-------|-------|-------|------------|------------|
| D.wil | ----- | ----- | ----- | -----      | -----      |
| D.sal | ----- | ----- | ----- | -----      | -----      |
| Z.ghe | ----- | ----- | ----- | -----      | -----      |
| D.vir | ----- | ----- | ----- | --CAGTAAGT | Gctcggagaa |
| D.gri | ----- | ----- | ----- | -----      | -----      |

|       |            |            |            |            |            |
|-------|------------|------------|------------|------------|------------|
| D.mel | GCGAATGCAT | CTCGGGTTCA | TCG--GCGGG | TCGAGTTTGT | TGCAACAACC |
| D.mau | GCGAATGCAT | CTCGGGTTCA | TCG--GCGGG | TCGAGTTTGT | TGCAACACCC |
| D.sim | GCGAATGCAT | CTCGGGTTCA | TCG--GCGGG | TCGAGTTTGT | TGCAACACCC |
| D.ere | GCGAATGCAT | CTCGGGTTCA | TCG--GCGGG | TCGAGTTTGT | TGCAACACcc |
| D.fuy | GCGAATGCAT | CTCGGGTTCA | ACG--GCGGG | TCGAGTTTGT | TGCAt--CAC |
| D.aur | --GAATGCAT | CTCGGGTTCA | TCGagGCAGG | TCGAGTTTGT | TGCAACACAC |
| D.obs | -----      | -----      | -----      | --GAGTTTGT | TGCAACAtc- |
| D.wil | -----      | -----      | -----      | -----      | -----      |
| D.sal | -----      | -----      | -----      | -----      | -----      |
| Z.ghe | -----      | -----      | -----      | -----      | -----      |
| D.vir | tgtgcaacgt | gcaacgtggt | gcaacgtgca | gcgtgcaacg | tggtgcag-- |
| D.gri | -----      | -----      | -----      | -----      | -----      |

|       |            |            |            |            |              |
|-------|------------|------------|------------|------------|--------------|
| D.mel | GAAGAaCGAA | GAAGTTGCAG | CGTGCGTT-- | -----CGG   | CATTA AAAATT |
| D.mau | GAAGAACGAA | GAAGTTGCAG | CGTGCGTT-- | -----CGG   | CATTA AAAATT |
| D.sim | GAAGAACGAA | GAAGTTGCAG | CGTGCGTT-- | -----CGG   | CATTA AAAATT |
| D.ere | gaagaa---- | ---GTTGCAG | CGTGCGTT-- | -----CGG   | CATTA AAAATT |
| D.fuy | C-----CGAA | GAAGTTGCAG | CGTGCGTC-- | -----CGG   | CATTA AAAATT |
| D.aur | C-----CGAA | GAAGTTGCAG | CATGCGTC-- | -----CGG   | CATTA AAAATT |
| D.obs | -----AA    | GAAGTTGCAA | CGTCCGtccg | tcctatgCGG | CATTA AAAATT |
| D.wil | -----      | -----      | --TGCCTC-- | -----CGG   | CATAAAAATT   |
| D.sal | -----      | -----      | --TGCCTC-- | -----CGG   | CATAAAAATT   |
| Z.ghe | -----      | -AACGTGCAA | CGTGCGTC-- | -----CGG   | CATAAAAATT   |
| D.vir | -----      | ---CGTGCAA | CGTGCGTC-- | -----CGG   | CATAAAAATT   |
| D.gri | -----      | -AACGTGCAA | CGTGCGTC-- | -----CGG   | CATAAAAATT   |

|       |            |             |            |            |            |
|-------|------------|-------------|------------|------------|------------|
| D.mel | GTGTTTATGC | GTGTTTCGGTA | A--TTTTATA | AAAGTTAAAT | TAGTTTTAAG |
| D.mau | GTGTTTATGC | GTGTTTCGGTA | A--TTTTATA | AAAGTTAAAT | TAGTTTTAAG |
| D.sim | GTGTTTATGC | GTGTTTCGGTA | A--TTTTATA | AAAGTTAAAT | TAGTTTTAAG |
| D.ere | GTGTTTATGC | GTGTTTCGGTA | A--TTTTATA | AAAGTTAAAT | TAGTTTTAAG |
| D.fuy | GTGTTTATGC | GTGTTTGGTA  | A--TTTTATA | AAAGTTAAAT | TAGTTTTAAG |
| D.aur | GTGTTTATGC | GTGTTTGGTA  | A--TTTTATA | AAAGTTAAAT | TAGTTTTAAG |
| D.obs | GTGTTTATGC | GTGTTTcggt  | aatTTTTATA | AAAGTTAAAT | TAGTTTTAAG |
| D.wil | GTGTTTATGC | GTGTTTGGTA  | A--TTTTATA | AAAGTTAAAT | TAGTTTTAAG |
| D.sal | GTGTTTATGC | GTGTTTGGTA  | A--TTTTATA | AAAGTTAAAT | TAGTTTTAAG |
| Z.ghe | GTGTTTATGC | GTGTTTGGTA  | A--TTTTATA | AAAGTTAAAT | TAGTTTTAAG |
| D.vir | GTGTTTATGC | GTGTTTGGTA  | A--TTTTATA | AAAGTTAAAT | TAGTTTTAAG |
| D.gri | GTGTTTATGC | GTGTTTGGTA  | A--TTTTATA | AAAGTTAAAT | TAGTTTTAAG |

|       |            |            |                           |                 |            |          |
|-------|------------|------------|---------------------------|-----------------|------------|----------|
| D.mel | ACCATAAATT | CAGCTCACTC | TCTCTC <u>t</u> <b>TC</b> | <b>GCTCTTTC</b> | --         | -----    |
| D.mau | ACCATAAATT | CAGCTCACTC | CCTCTC--TC                | GCTCTTTC        | --         | -----    |
| D.sim | ACCATAAATT | CAGCTCACTC | CCTCTC--TC                | GCTCTTTC        | --         | -----    |
| D.ere | ACCATAAATT | CAGCTCACTC | Tctct-----                | -----           | -----      | -----    |
| D.fuy | ACCATAAATT | CAGCGCACTC | TCTggcat--                | -----           | -----      | -----AG- |
| D.aur | ACCATAAATT | CAGCGCACTC | TCGCTggcgc                | agttccccat      | ggcccgaAG- |          |
| D.obs | gccataaatt | ccggactcat | tctgaggcac                | tctctagggt      | gcccctggcc |          |
| D.wil | ACCATAAATT | GTGCTCCCTC | TCAGTCGCAC                | TCgcagtctg      | ccccctcgca |          |
| D.sal | ACCATAAATT | GTGCTCCCTC | TCAGTCTCAC                | ACacttgcac      | actattgcta |          |
| Z.ghe | ACCATAAATT | GTGCTtgtgt | agtcgctgct                | cttaccgctg      | ctgctgttgt |          |
| D.vir | ACCATAAATT | GTGCCCCCCC | Tgccttgccc                | tgactgcc--      | -----      | -----    |
| D.gri | ACCATAAATT | GTGCTgttgc | ctttgctctg                | tttatgctct      | acctaccccc |          |

(Dimorphic element mel Fwd Primer)>

|       |            |            |            |            |             |       |
|-------|------------|------------|------------|------------|-------------|-------|
| D.mel | -----      | -----      | -----      | -----      | <b>TCT-</b> | ----- |
| D.mau | -----      | -----      | -----      | -----      | TCT-        | ----- |
| D.sim | -----      | -----      | -----      | -----      | TCT-        | ----- |
| D.ere | -----      | -CTCTATCTC | GCTCTCGCTC | TCGCTCTCT- | -----       | ----- |
| D.fuy | -----      | -----      | -----      | -----      | TCT-        | ----- |
| D.aur | -----      | -----      | -----      | -----      | TCT-        | ----- |
| D.obs | tgcccctctg | gtccgtctct | ctcttgttgc | cat-----   | -----       | ----- |
| D.wil | ttctctctgt | ctgacacac- | -----      | -----      | -----       | ----- |
| D.sal | tccccactc  | aCTCTCTCTC | TCTCTCTCTC | TCTCTCTgtg | tgtgtgttgc  |       |
| Z.ghe | tgttgttggt | ggagctgcag | ttgcagaagt | tgttgctgca | ttcacccgtt  |       |
| D.vir | -----      | -----      | -----      | -----      | -----       | ----- |
| D.gri | tccccctccc | cctctccatc | cccatccatc | aacct----- | -----       | ----- |

|       |             |            |            |               |                    |                    |
|-------|-------------|------------|------------|---------------|--------------------|--------------------|
| D.mel | -----       | -----      | -----      | <b>TTGCCA</b> | <b>TTTTAACTTT</b>  | <b>TAT</b> TACTCTT |
| D.mau | -----       | -----      | -----      | TTGCCA        | GTTTAACTTT         | <b>TAT</b> TACTCTT |
| D.sim | -----       | -----      | -----      | TTGCCA        | TTTTAACTTT         | <b>TAT</b> TACTCTT |
| D.ere | -----       | -----      | -----      | CTGCCA        | TTTTAACTTT         | <b>TAT</b> TACTCTT |
| D.fuy | -----       | -----      | -----      | CTGCCA        | TTTTAACTTT         | <b>TAT</b> TACTTTT |
| D.aur | -----       | -----      | -----      | CTGCCA        | TTTTAACTTT         | <b>TAT</b> TACTTTT |
| D.obs | -----       | -----      | -----      | -----         | TTTTAACTTT         | <b>TAT</b> TACTTTT |
| D.wil | -----       | ----TTGCTC | TTGCTTGCCA | TTTTAACTTT    | <b>TAT</b> TACTTTT |                    |
| D.sal | tctcttttcta | tcgtTTGCTC | TTGCTTGCCA | TTTTAACTTT    | <b>TAT</b> TACTTTT |                    |
| Z.ghe | tgccccctca  | tcgtcgtegt | tg--TTGCCA | TTTTAACTTT    | <b>TAT</b> TACTTTT |                    |
| D.vir | -----       | -----      | -TGCTGCCA  | TTTTAACTTT    | <b>TAT</b> TACTTTT |                    |
| D.gri | -----       | -----      | TTGCTGCCA  | TTTTAACTTT    | <b>TAT</b> TACTTTT |                    |

|       |                     |            |            |            |            |
|-------|---------------------|------------|------------|------------|------------|
| D.mel | AAT <b>ATAAA</b> -- | ---AAAGCTG | GCTAGATGCG | GGC-----   | -----      |
| D.mau | AAT <b>ATAAA</b> -- | ---AAAGCTG | GCTAGAAGCG | GGC-----   | -----      |
| D.sim | AAT <b>ATAAA</b> -- | ---AAAGCTG | GCTAGAAGCG | GGC-----   | -----      |
| D.ere | AAT <b>ATAAA</b> AA | A-----GCTG | GCTAGAAGCG | GGC-----   | -----      |
| D.fuy | AAT <b>ATAAA</b> AA | A-----GCTG | GATAGAAGCG | GGC-----   | -----      |
| D.aur | AAT <b>ATAAA</b> ga | AAAAAAGGTG | GCTAGGAGCA | GGC-----   | -----      |
| D.obs | AAT <b>ATAAA</b> AA | aacagagaga | gagagagaga | gggagcgctg | gaatccaagg |
| D.wil | AAT <b>ATAAA</b> AA | A-----GCTG | GCTGGGAT-- | -----      | -----      |
| D.sal | AAT <b>ATAAA</b> AA | A-----GCTG | GCTGGGAT-- | -----      | -----      |
| Z.ghe | AAT <b>ATAAA</b> AA | A-----GCTG | GCGCTGTgtg | tagctcgccc | aaggagggca |
| D.vir | AAT <b>ATAAA</b> AA | A-----GCTG | GCGCTGggct | ggcaaagcag | ccgccagttc |
| D.gri | AAT <b>ATAAA</b> AA | A-----GCTG | GCGCTGTtgc | aagcaag--- | -----      |

2

|       |            |            |            |                    |            |
|-------|------------|------------|------------|--------------------|------------|
| D.mel | -----      | -----      | -----CA    | GCT--- <b>GTAA</b> | AAA--TGCAC |
| D.mau | -----      | -----      | -----CA    | GCT--- <b>GTAA</b> | AAA--TGCAC |
| D.sim | -----      | -----      | -----CA    | GCT--- <b>GTAA</b> | AAA--TGCAC |
| D.ere | -----      | -----      | -----CA    | GCT--- <b>GTAA</b> | AAA--TGCAT |
| D.fuy | -----      | -----      | -----CA    | GCT--- <b>GTAA</b> | AAA--TGCAC |
| D.aur | -----      | -----      | -----CA    | GCTgta <b>GTAA</b> | AAA--TGCAC |
| D.obs | agcagggcat | acgaatgtgT | GGCAGCAACA | GCT--- <b>GTAA</b> | AAA--TGCAC |
| D.wil | -----      | -----T     | GGGAGCAGGA | GCT--- <b>GTAA</b> | AAA--TGCAC |
| D.sal | -----      | -----T     | GGGAGCAGGA | GCT--- <b>GTAA</b> | AAA--TGCAC |
| Z.ghe | gcagccaaAG | GAGCCGCTTG | CCAGCT--GA | GCT--- <b>GTAA</b> | AAC--TGCAC |
| D.vir | gttcgca--- | -----      | -CAGCT--CA | GCT--- <b>GTAA</b> | AACgcTGCAC |
| D.gri | -----AG    | GAGCCGCTAG | CCAGCT--GA | GCT--- <b>GTAA</b> | AAC--TGCAC |

3

|       |                    |            |            |             |            |
|-------|--------------------|------------|------------|-------------|------------|
| D.mel | GCGGTC <b>ATAA</b> | AAAGTTGCAG | GAGGcat--- | -----       | --GTTGCCAG |
| D.mau | GCGGTC <b>ATAA</b> | AAAGTTGCAG | GAGGCATGTT | GCC-----    | -----AG    |
| D.sim | GCGGTC <b>ATAA</b> | AAAGTTGCAG | GAGGCATGTT | GCC-----    | -----AG    |
| D.ere | GCGGTC <b>ATAA</b> | AAAGTTGCAG | GCGGCacgtt | gcca-----   | --GTTGCCAG |
| D.fuy | GCGGTC <b>ATAA</b> | AAAGTTGCAG | GAGGCATGTT | GCTggttagcc | aaGTTGCCAG |
| D.aur | GCGGTC <b>ATAA</b> | AAAGTTGCAG | gaggcatcta | catcgacgtc  | cacatccaca |
| D.obs | GCGGTC <b>ATAA</b> | AAAGTTGCAG | GCAGaggagg | caggcagacg  | aagcggtgcc |
| D.wil | GCGGTC <b>ATAA</b> | AAAGTTGCAG | GCAGGCA--- | -----       | -----      |
| D.sal | GCGGTC <b>ATAA</b> | AAAGTTGCAG | GCAGGCA--- | -----       | -----      |
| Z.ghe | GCTGCC <b>ATAA</b> | AAAGTTGCAA | GCGGCagc-- | -----       | -----      |
| D.vir | GCTGCC <b>ATAA</b> | AAAGTTGCAA | GCAGCagccg | ctgctgctgc  | gTCACATGTT |
| D.gri | GCTGCC <b>ATAA</b> | AAAGTTGCAA | GCAGCattt- | -----       | -TCACATGTT |

4

|       |            |            |            |       |       |
|-------|------------|------------|------------|-------|-------|
| D.mel | TTGCCTGCAA | CCGGCAACAT | TCGC-----  | ----- | ----- |
| D.mau | TTGCCTGCAA | CCGGCAACAT | CCGC-----  | ----- | ----- |
| D.sim | TTGCCTGCAA | CCGGCAACAT | CCGC-----  | ----- | ----- |
| D.ere | TTGCCTGCAA | CCGGCAACAT | CCaC-----  | ----- | ----- |
| D.fuy | TTGCCGGTTG | CCTGCAACAT | CCactga--- | ----- | ----- |



|       |            |            |            |            |            |
|-------|------------|------------|------------|------------|------------|
| D.aur | tcgccatcgg | gctggagtcc | ccgggatcgg | ttggtatggt | -----      |
| D.obs | agcagaggca | cagcacagca | cagggcggcg | gagaatggtg | ccagtgaa-- |
| D.wil | -----      | -----      | -----      | -----      | ---AGCAGG- |
| D.sal | -----      | -----      | -----      | -----      | ---GGCAaaa |
| Z.ghe | -----      | -----      | -----      | -----      | -----      |
| D.vir | GCGCGGCAAC | ATTGCCTACT | g-----     | ---GCAACAT | TGCAGCAAG- |
| D.gri | GCTCGGCAAC | ATAGCCTACa | actactacta | cttGCAACAT | TGCATCAAG- |

|       |            |            |            |            |            |
|-------|------------|------------|------------|------------|------------|
| D.mel | -----      | -----      | -----      | -----      | -----      |
| D.mau | -----      | -----      | -----      | -----      | -----      |
| D.sim | -----      | -----      | -----      | -----      | -----      |
| D.ere | -----      | -----      | -----      | -----      | -----      |
| D.fuy | -----      | -----      | -----      | -----      | -----      |
| D.aur | -----      | -----      | -----      | -----      | -----      |
| D.obs | -----      | -----      | -----      | -----      | -----      |
| D.wil | -----      | -----      | -----      | -----      | ---AGGCATG |
| D.sal | gcaaaagcaa | gaagcaagga | gggggggggg | gcaggcgggc | acaAGGCATG |
| Z.ghe | -----      | -----      | -----      | -----      | -----      |
| D.vir | -----      | -----      | -----      | -----      | ---TGGCAAG |
| D.gri | -----      | -----      | -----      | -----      | ---AAGCAAt |

|       |            |            |            |            |                    |
|-------|------------|------------|------------|------------|--------------------|
| D.mel | -----      | --AGAACAGC | A-----     | ----GCAACA | ----TC <b>GTAA</b> |
| D.mau | -----      | --ACAACAGC | A-----     | ----GCAACA | ----TC <b>GTAA</b> |
| D.sim | -----      | --ACAACAGC | A-----     | ----GCAACA | ----TC <b>GTAA</b> |
| D.ere | -----      | --AGAACAGC | A-----     | ----GCAACA | ----TC <b>GTAA</b> |
| D.fuy | -----      | ----AACGGC | A-----     | ----GCAACA | ----TC <b>GTAA</b> |
| D.aur | -----      | ----GC     | A-----     | ----GCAACA | ----TC <b>GTAA</b> |
| D.obs | -----      | --ACAGCAGC | A-----     | ----GCAACA | ----TC <b>GTAA</b> |
| D.wil | CGGCATGAGG | CATGCGGCAT | GAGAGATGTT | GCTGGCAACA | ----TC <b>GTAA</b> |
| D.sal | ATGATGGGGG | CATGAGGCAT | GAGAGATGTT | GCTGGCAACA | ----TC <b>GTAA</b> |
| Z.ghe | -----GG    | CAGCAGAAGC | A-----     | ----GCAGCA | GCAggaacgt         |
| D.vir | TGGCAAGAGG | CAGCAGCAGC | A-----     | ----GCAGCA | GC--tc <b>GTAA</b> |
| D.gri | t-----G    | CAGCAGCAGC | A-----     | ----GCAGCA | GCAaTC <b>GTAA</b> |

5

|       |                    |             |            |            |                    |
|-------|--------------------|-------------|------------|------------|--------------------|
| D.mel | <b>AATAA</b> CTTCT | TGCTCTGCGG  | TCTGAGTTTG | GCC-----   | -----              |
| D.mau | <b>AATAA</b> CTTCT | TGCTCTGCGG  | TCTGCATTTG | GCC-----   | -----              |
| D.sim | <b>AATAA</b> CTTCT | TGCTCTGCGG  | TCTGCATTTG | GCC-----   | -----              |
| D.ere | <b>AATGA</b> CTTCT | TGCTCTGCGG  | TCTACGTTTG | GTC-----   | -----              |
| D.fuy | <b>AATAA</b> TTTCT | TGCTCTGCGG  | TCTCCATTTG | GCC-----   | -----              |
| D.aur | <b>AATAA</b> TTTCT | TGCTCTGCGG  | TCTCCGTTTG | GCC-----   | -----              |
| D.obs | <b>AATAA</b> TTTCT | TGCAAttcgca | tcgcgattgc | tgtggc---- | -----              |
| D.wil | <b>AATAA</b> TTTCT | TGCAATCCCA  | TTTTTTTCGC | CTC-----   | ---- <b>TGTTG</b>  |
| D.sal | <b>AATAA</b> TTTCT | TGCAATCCCA  | TTTTTTTCGC | CTCtgttgct | gttgg <b>TGTTG</b> |
| Z.ghe | cacatgttgc         | tcgcaacata  | gcctactact | ggcaaccggc | agtcggcagc         |
| D.vir | <b>AATgagc</b> gcc | agt-----    | -----      | -----      | -----              |
| D.gri | <b>AATGACT</b> caa | atgctct---  | -----      | -----      | -----              |

t

|       |                          |                          |                          |                          |                          |
|-------|--------------------------|--------------------------|--------------------------|--------------------------|--------------------------|
| D.mel | -----                    | -----                    | -----                    | -----                    | -----                    |
| D.mau | -----                    | -----                    | -----                    | -----                    | -----                    |
| D.sim | -----                    | -----                    | -----                    | -----                    | -----                    |
| D.ere | -----                    | -----                    | -----                    | -----                    | -----                    |
| D.fuy | -----                    | -----                    | -----                    | -----                    | -----                    |
| D.aur | -----                    | -----                    | -----                    | -----                    | -----                    |
| D.obs | -----                    | -----                    | -----                    | -----                    | -----                    |
| D.wil | <b><u>TTGCTGCTGC</u></b> | <b><u>TGCTGCTGCT</u></b> | <b><u>GCTTCttcat</u></b> | <b><u>atttttcgtt</u></b> | <b><u>-TTTGGTT--</u></b> |
| D.sal | TTGGTGGTGG               | TGCTGCTGCT               | GCTTCttcctt              | cttattattc               | gTTTCGTT--               |
| Z.ghe | aatcggaggc               | aacacatcgc               | atccaaaaga               | catcatgcaa               | catgcaatcg               |
| D.vir | -----                    | -----                    | -----                    | -----                    | -----                    |
| D.gri | -----                    | -----                    | -----                    | -----                    | -----                    |

**region I (+58 bp)**

|       |            |            |            |            |            |
|-------|------------|------------|------------|------------|------------|
| D.mel | -----      | -----      | -----      | -----      | -----      |
| D.mau | -----      | -----      | -----      | -----      | -----      |
| D.sim | -----      | -----      | -----      | -----      | -----      |
| D.ere | -----      | -----      | -----      | -----      | -----      |
| D.fuy | -----      | -----      | -----      | -----      | -----      |
| D.aur | -----      | -----      | -----      | -----      | -----      |
| D.obs | -----      | -----      | -----      | -----      | -----      |
| D.wil | -----      | -----      | -----      | -----      | -----      |
| D.sal | -----      | -----      | -----      | -----      | -----      |
| Z.ghe | taaaccgagt | acgcTGCAAC | GTTTTGTTCT | GCCGTCGGTT | TTTTTTATta |
| D.vir | -----      | ----TGCAGC | GTTTTGTTCT | GCggctttta | ttgtgtg--  |
| D.gri | -----      | -----GC    | GTTTTGTTCT | GCAATTTTAT | TTTTTAATac |

|       |                              |            |            |            |            |
|-------|------------------------------|------------|------------|------------|------------|
| D.mel | -----                        | -----      | -----      | -----      | -----      |
| D.mau | -----                        | -----      | -----      | -----      | -----      |
| D.sim | -----                        | -----      | -----      | -----      | -----      |
| D.ere | -----                        | -----      | -----      | -----      | -----      |
| D.fuy | -----                        | -----      | -----      | -----      | -----      |
| D.aur | -----                        | -----      | -----      | -----      | -----      |
| D.obs | -----TGTT-                   | -----      | -----      | -----      | -----      |
| D.wil | --- <b><u>TGTATT</u></b> --- | -----      | -----      | -----      | -----      |
| D.sal | ---TGTGTT-                   | -----      | -----      | -----      | -----      |
| Z.ghe | gtgTGCAAT-                   | -----      | -----      | -----      | -----      |
| D.vir | -----                        | -----      | -----      | -----      | -----      |
| D.gri | tcttgccgaa                   | ggttctattg | agaagtctac | gactgcataa | gacataagac |

|       |       |       |       |       |       |
|-------|-------|-------|-------|-------|-------|
| D.mel | ----- | ----- | ----- | ----- | ----- |
| D.mau | ----- | ----- | ----- | ----- | ----- |
| D.sim | ----- | ----- | ----- | ----- | ----- |
| D.ere | ----- | ----- | ----- | ----- | ----- |
| D.fuy | ----- | ----- | ----- | ----- | ----- |
| D.aur | ----- | ----- | ----- | ----- | ----- |
| D.obs | ----- | ----- | ----- | ----- | ----- |

|       |            |            |            |                   |                           |
|-------|------------|------------|------------|-------------------|---------------------------|
| D.wil | -----      | -----      | -----      | -----             | -----                     |
| D.sal | -----      | -----      | -----      | -----             | -----                     |
| Z.ghe | -----      | -----      | -----      | -----             | -----                     |
| D.vir | -----      | -----      | -----      | -----             | -----                     |
| D.gri | tatatatata | tatatataaa | tcatctgata | gattctgctg        | tgcatctcag                |
|       |            |            |            |                   |                           |
| D.mel | -----      | -----      | -----      | -----             | -----                     |
| D.mau | -----      | -----      | -----      | -----             | -----                     |
| D.sim | -----      | -----      | -----      | -----             | -----                     |
| D.ere | -----      | -----      | -----      | -----             | -----                     |
| D.fuy | -----      | -----      | -----      | -----             | -----                     |
| D.aur | -----      | -----      | -----      | -----             | -----                     |
| D.obs | -----      | -----      | -----      | -----             | -----                     |
| D.wil | -----      | -----      | -----      | -----             | -----                     |
| D.sal | -----      | -----      | -----      | -----             | -----                     |
| Z.ghe | -----      | -----      | -----      | -----             | -----                     |
| D.vir | -----      | -----      | -----      | -----             | -----                     |
| D.gri | agcatcaact | ttgacttgaa | atttctcatc | gattttttga        | tttcattttg                |
|       |            |            |            |                   |                           |
| D.mel | -----      | -----      | -----      | -----             | -----                     |
| D.mau | -----      | -----      | -----      | -----             | -----                     |
| D.sim | -----      | -----      | -----      | -----             | -----                     |
| D.ere | -----      | -----      | -----      | -----             | -----                     |
| D.fuy | -----      | -----      | -----      | -----             | -----                     |
| D.aur | -----      | -----      | -----      | -----             | -----                     |
| D.obs | -----      | -----      | -----      | -----             | -----                     |
| D.wil | -----      | -----      | -----      | -----             | -----                     |
| D.sal | -----      | -----      | -----      | -----             | -----                     |
| Z.ghe | -----      | -----      | -----      | -----             | -----                     |
| D.vir | -----      | -----      | -----      | -----             | -----                     |
| D.gri | gaattagcct | tggctgcaga | gtatcgcaaa | gtcgacttgc        | attgagttgg                |
|       |            |            |            |                   |                           |
| D.mel | -----      | -----      | -----      | <b>GCAACAATGT</b> | <b>TGCTGCA</b> <b>TTT</b> |
| D.mau | -----      | -----      | -----      | <b>GCAACAATGT</b> | <b>TGCTGCA</b> <b>TTT</b> |
| D.sim | -----      | -----      | -----      | <b>GCAACAATGT</b> | <b>TGCTGCA</b> <b>TTT</b> |
| D.ere | -----      | -----      | -----      | <b>GCAACAATGT</b> | <b>TGCTGCA</b> <b>TTT</b> |
| D.fuy | -----      | -----      | -----      | <b>GCAACAATGT</b> | <b>TGCTGCA</b> <b>TTT</b> |
| D.aur | -----      | -----      | -----      | <b>GCAACAATGT</b> | <b>TGCCGCA</b> <b>TTT</b> |
| D.obs | -----      | -----      | -----      | <b>GCAACAATGT</b> | <b>TGCCACATTC</b>         |
| D.wil | -----      | -----      | -----      | <b>GCAACATTGT</b> | <b>GGCAACA</b> <b>TTT</b> |
| D.sal | -----      | -----      | -----      | <b>GCAACATTGT</b> | <b>GGCAACA</b> <b>TTT</b> |
| Z.ghe | -----      | -----      | -----      | <b>GTAACATTGT</b> | <b>TGCAACA</b> <b>TTT</b> |
| D.vir | -----      | -----      | -----TGC   | CACACAATGT        | TGCAACACTT                |
| D.gri | acactgtaa  | ttgtgatgat | agccgctTGC | CACACAATGT        | TGCAtcgcac                |
| Z.vit |            |            |            | <b>GTAACAATGT</b> | <b>TGCAACA</b> <b>TTT</b> |
| D.tri |            |            |            | <b>GTAACAATGT</b> | <b>TGCAACA</b> <b>TTT</b> |

(ins I in D. mel)^ **Dsx1**

|       |                    |                           |                     |                     |                           |
|-------|--------------------|---------------------------|---------------------|---------------------|---------------------------|
| D.mel | <b>ATTC</b> ---G-- | -T <u><b>ATTATTAT</b></u> | TACA-TTTTA          | ATGA <b>ATAA</b> TT | CTAA <u><b>TTATAT</b></u> |
| D.mau | <b>ATTC</b> ---G-- | -TATTATTAT                | TACA-ATTTA          | ATGAATAA <b>TT</b>  | CTAATTATAT                |
| D.sim | <b>ATTC</b> ---G-- | -TATTATTAT                | TACA-ATTTA          | ATGAATAA <b>TT</b>  | CTAATTATAT                |
| D.ere | <b>ATTC</b> ---G-- | -TATTATTAT                | TACA-TTTTA          | ATGAATAA <b>TT</b>  | CTAATTATAT                |
| D.fuy | <b>ATTC</b> ---G-- | -TATTATTAT                | TACA-TTTTA          | ATGATTA <b>TT</b>   | CTAATTATAT                |
| D.aur | <b>ATTC</b> ---G-- | -TATTATTAT                | TACA-TTTTA          | ATGATTA <b>TT</b>   | CTAATTATAT                |
| D.obs | ATTCCtcG--         | -AATTATTAT                | TACA-TTTTA          | ATGATTAA <b>aa</b>  | ttctaagtgtg               |
| D.wil | <b>ATACCA</b> -G-- | -AATTATTAT                | TACA-ATTTA          | ATGATTA <b>TT</b>   | CTAATGATAT                |
| D.sal | <b>ATACCA</b> -G-- | -AATTATTAT                | TACA-ATTTA          | ATGATTA <b>TT</b>   | CTAATGATAT                |
| Z.ghe | <b>ATAC</b> ---G-- | -AATTATTAT                | TACA <b>t</b> TTTTA | ATGATTA <b>TT</b>   | CTAATGATAT                |
| D.vir | ATGC---G--         | -CATTATTAT                | TACA-TTTTA          | ATGATTA <b>TT</b>   | CTAATGATAT                |
| D.gri | acacttgtgc         | aAATGATTAT                | CACA-TTTTA          | ATGATTA <b>TT</b>   | CTAATGATAT                |

t t

t

t

|       |            |             |                    |                     |            |
|-------|------------|-------------|--------------------|---------------------|------------|
| D.mel | GCAACTTGA- | -----       | ----- <b>ATAAG</b> | C-----              | -----      |
| D.mau | GCGACTTGA- | -----       | -----ATAAG         | G-----              | -----      |
| D.sim | GCGACTTGA- | -----       | -----ATAAG         | G-----              | -----      |
| D.ere | GCAACTTGA- | -----       | -----ATAAG         | Ggccgctgca          | agagcgtcGA |
| D.fuy | GCGACTTGA- | -----       | -----ATAAG         | GCCG <b>C</b> tgact | gagcgaaa-A |
| D.aur | GCGACTTGA- | -----       | -----ATAAG         | Gccg <b>cc</b> gaat | ggccgaatga |
| D.obs | atgcgaatcg | gcagcgcacat | ggccatggca         | gaggaa <b>atcc</b>  | cacatgggaa |
| D.wil | GCGACATGA- | -----       | -----              | -----               | -----      |
| D.sal | GCGACATGA- | -----       | -----              | -----               | -----      |
| Z.ghe | GCGACATGA- | -----       | -----              | -----               | -----      |
| D.vir | GCGACATGA- | -----       | -----              | -----               | -----      |
| D.gri | GCGACATGA- | -----       | -----              | -----               | -----      |

t

|       |            |             |                             |            |            |
|-------|------------|-------------|-----------------------------|------------|------------|
| D.mel | -----      | CCGCCGATGC  | CA <b>ATAAA</b> AAG         | -CGGCGTGGC | AAAGTGGAGT |
| D.mau | -----      | CCGCAGAAGC  | CA <b>ATAAA</b> AAG         | CCGGCGTGGC | AAAGTGGAGT |
| D.sim | -----      | CCGCAGAAGC  | CA <b>ATAAA</b> AAG         | CCGGCGTGGC | AAAGTGGAGT |
| D.ere | -----      | -----AGC    | CA <b>ATAAA</b> AAG         | -TGCCGGGGC | AAAGTGGAGT |
| D.fuy | -----      | -----AGC    | CA <b>ATAAA</b> AAG         | -TGCCGAGGC | AAAGTGGAGT |
| D.aur | -gaaatgctc | tggcagcgcGC | CA <b>ATAAA</b> AAA         | TGGCCGGGGC | AAAGTGGAGT |
| D.obs | atactAAATG | AAATGGCAGC  | CA <b>ATAAA</b> tg <b>c</b> | gccaatccaa | agagtgctgc |
| D.wil | -----AAATG | AAATGGCAAC  | CA <b>ATAAA</b> AAG         | AATCTaccct | ttcctaacca |
| D.sal | -----AAATG | AAATGGCAAC  | CA <b>ATAAA</b> AAG         | AATCTgcctt | cccacttttc |
| Z.ghe | -----AGTTG | AAATGGCAAT  | CG <b>ATAAA</b> --          | -----      | -----      |
| D.vir | -----AAATG | AAATGGCAAT  | CA <b>ATAAA</b> --          | -----      | -----      |
| D.gri | -----AAATG | AAATGGCTAT  | CA <b>ATAAA</b> --          | -----      | -----      |

7

|       |                     |            |            |                    |                    |
|-------|---------------------|------------|------------|--------------------|--------------------|
| D.mel | GGA <b>CTGGG</b> tt | tgtgtggcgc | CCCTGCTAGT | GGCAC <b>ATAAA</b> | AATTGGC---         |
| D.mau | GGATTGGCga          | tgtgtggcgc | CCCAGCTAGT | GGCAC <b>ATAAA</b> | AATTGGC---         |
| D.sim | GGATTGGCga          | tgtgtggcgc | CCCGGCTAGT | GGCAC <b>ATAAA</b> | AATTGGC---         |
| D.ere | GGATTT <b>CG</b> ga | tgtgtggcgc | CCCTGCTAGT | GGCAC <b>ATAAA</b> | AATTGGC---         |
| D.fuy | GGATTT <b>TG</b> gc | cgtgtggcgc | CCcgtgCTGC | TAGTGGCACA         | <b>TAAA</b> AATTGG |

|       |            |            |            |                    |                    |
|-------|------------|------------|------------|--------------------|--------------------|
| D.aur | Gttttttttt | tggtegccgt | gtggcgcccc | aGGGAgggcga        | CTCGTAGTGG         |
| D.obs | tgtggcgctt | ccccgggtgg | c-----AGC  | GGCAC <b>ATAAA</b> | AATTGGCGC-         |
| D.wil | catgcaactg | ccaggctgaa | ggctgctcaa | gacagaccga         | ctgactg <b>act</b> |
| D.sal | actctacatc | aacatctctt | cccacatgca | acaTGCGACA         | GCAGCAACAG         |
| Z.ghe | -----      | ---TGCCACA | GCA--GCAAA | GGCAC <b>ATAAA</b> | AAT                |
| D.vir | -----      | -----      | -----      | -----              | -----              |
| D.gri | -----      | -----      | -----      | -----              | -----              |

8

|       |                     |                    |                   |                   |                   |
|-------|---------------------|--------------------|-------------------|-------------------|-------------------|
| D.mel | -----               | -----              | -----             | -----             | -----             |
| D.mau | -----               | -----              | -----             | -----             | -----             |
| D.sim | -----               | -----              | -----             | -----             | -----             |
| D.ere | -----               | -----              | -----             | -----             | -----             |
| D.fuy | C-----              | -----              | -----             | -----             | -----             |
| D.aur | GGC <b>ATAAA</b> AA | TTGGT-----         | -----             | -----             | -----             |
| D.obs | -----               | -----              | -----             | -----             | -----             |
| D.wil | <b>gacaagcagg</b>   | <b>cagcagggcag</b> | <b>gcggcagtaa</b> | <b>----GGCAGT</b> | <b>CAGATTGAAG</b> |
| D.sal | CAGcagcaac          | accaaaagca         | aaaggctggc        | aggcGGCATT        | CAGATTGAAG        |
| Z.ghe | CAGtgCAGAA          | CTCTGCTTTA         | GTTCTTATGA        | CCgacgatgc        | cgccgcctgg        |
| D.vir | ----tCGGGC          | ATTTGCTTTt         | ttccttattc        | ctacaactac        | ttcgtcttct        |
| D.gri | ----tCAGAC          | ATTTGCTTTA         | GTTTTTTTCT        | Cttctgcca         | tctcactttg        |

region II (+98 bp)

|       |                   |                   |                   |                 |                   |
|-------|-------------------|-------------------|-------------------|-----------------|-------------------|
| D.mel | -----             | -----             | -----             | -----           | -----             |
| D.mau | -----             | -----             | -----             | -----           | -----             |
| D.sim | -----             | -----             | -----             | -----           | -----             |
| D.ere | -----             | -----             | -----             | -----           | -----             |
| D.fuy | -----             | -----             | -----             | -----           | -----             |
| D.aur | -----             | -----             | -----             | -----           | -----             |
| D.obs | -----             | -----             | -----             | -----           | -----             |
| D.wil | <b>GATTCGCTcT</b> | <b>TCGGTTTTGT</b> | <b>TGGTTTCGGT</b> | <b>TTG-----</b> | <b>TGGCGCCCCA</b> |
| D.sal | GATTCGCTgT        | TCGGTTTTGT        | CGGTTTCGGT        | TTG-----        | TGGCGCCCCA        |
| Z.ghe | cgccgcgggg        | cagcgtt---        | -----             | -----           | -----             |
| D.vir | tctgctttgt        | ttc-----          | -----             | -----TG         | TGGCGCCACA        |
| D.gri | ttttttattt        | tttctgttct        | ttttttccat        | tcggttGTTTG     | TGGCGCCACA        |

|       |                    |            |       |            |            |
|-------|--------------------|------------|-------|------------|------------|
| D.mel | -----              | -----      | ----- | -----GCAA  | GTTAATTGTG |
| D.mau | -----              | -----      | ----- | -----GCAA  | GTTAATTGTG |
| D.sim | -----              | -----      | ----- | -----GCAA  | GTTAATTGTG |
| D.ere | -----              | -----      | ----- | -----GCAA  | GTTAATTGTG |
| D.fuy | -----              | -----      | ----- | -----GCAA  | GTTAATTGTG |
| D.aur | -----              | -----      | ----- | -----Gct-  | GTTAATTGTG |
| D.obs | -----              | -----      | ----- | -----ACAA  | GTTAATTGTG |
| D.wil | <u>cggaca</u> ---- | -----      | ----- | -----GCAA  | GTTAATTGTG |
| D.sal | cggaca----         | -----      | ----- | -----GCAA  | GTTAATTGTG |
| Z.ghe | -----              | -----      |       | TG--GCCCAA | GTTAATTGTG |
| D.vir | GGCAGCGTgc         | cgcacac--- | ----- | TG--GCCCAA | GTTAATTGTG |
| D.gri | GGCAGCGTtc         | gccatttggg | ----- | -G--GCCCAA | GTTAATTGTG |

(ins II in D. mel) ^

|       |                     |            |            |            |                    |
|-------|---------------------|------------|------------|------------|--------------------|
| D.mel | GTAG <b>TTAT</b> TT | GCTGT--TTT | GCCATTTGGT | -----C---  | -----AT <b>T</b>   |
| D.mau | GTAGTTATTT          | GCTGT--TTT | GCCATTTGGT | -----C---  | -----AT <b>T</b>   |
| D.sim | GTAGTTATTT          | GCTGT--TTT | GCCATTTGGT | -----C---  | -----AT <b>T</b>   |
| D.ere | GTAGTTATTT          | GCTGT--TTT | GCCATTTTGC | CATTTggtca | ttttgcaAT <b>T</b> |
| D.fuy | GTAGTTATTT          | GCTGT--TTT | GCCATttggc | cg-----    | -----T <b>T</b>    |
| D.aur | GTAGTTATTT          | GCTGT--TTT | GCCATTTGGC | CATTTc---- | -----              |
| D.obs | GTAGTTATTT          | CTGctggTGC | TGCTGCTGct | ttgtggC--- | -----ATC           |
| D.wil | GTAGTTATTT          | GCTAT--TTT | GCCAT----- | -----      | -----T             |
| D.sal | GTAGTTATTT          | GCTAT--TTT | GCCAT----- | -----      | -----T             |
| Z.ghe | GTAGTTATTT          | GTTGT--TGT | TGCTGCTGct | cctcctcctg | ttgttgtttt         |
| D.vir | GCAGTTATTT          | GTTGT--Tat | atatagagcc | aagagctctt | ggcct-----         |
| D.gri | GTAGTTATTT          | CTGttattat | tccaaagagt | tttgctctac | acacagcggg         |

t

|       |                    |                   |            |             |            |
|-------|--------------------|-------------------|------------|-------------|------------|
| D.mel | <b>TTACAATTTT</b>  | <b>ACCATTTCAG</b> | CCAC---AAC | TTTTCGCACT  | GCTCCCcccc |
| D.mau | <b>TTACAATTTT</b>  | <b>ACCc</b> ----- | -----      | -----       | -----CCT   |
| D.sim | <b>TTACAATTTT</b>  | <b>ACCATTTCAG</b> | CCAC---AAC | TTTTCTCACT  | GcaccCCT   |
| D.ere | <b>TTACAATTTT</b>  | <b>ACCATTCCAG</b> | CCAC---AAC | TTTTCGCACT  | GCTCCcttcg |
| D.fuy | <b>TTACAATTTT</b>  | <b>ACCATTCT-G</b> | CCAC---AAC | TTTTCGCATT  | GCTCCGCTTG |
| D.aur | --ACAAT <b>TTT</b> | <b>ACCATTCT-G</b> | CCACcacAAC | TTTTCACATT  | GCTCTGGTTG |
| D.obs | <b>TTACAATTTT</b>  | <b>ACCATTCTG</b>  | CCAC---Aca | acttttttega | taccaaggca |
| D.wil | <b>TTACAATTTT</b>  | <b>ACCACAAGTT</b> | TTGCGCATTT | -----       | -----      |
| D.sal | <b>TTACAATTTT</b>  | <b>ACCACAAGTT</b> | TTGCGCATTT | -----       | -----      |
| Z.ghe | tgccatagag         | ttttccacaa        | tttcttttgc | tg-----     | -----      |
| D.vir | -----              | -----             | -----      | -----       | -----      |
| D.gri | gctgtgtgtg         | tgtgtgtgtg        | caacaat--- | -----       | -----      |

9

10

|       |            |            |                    |                       |              |
|-------|------------|------------|--------------------|-----------------------|--------------|
| D.mel | tttccCAG-- | -----      | -----              | <b>ACAA</b> CAATGTTGC | GCATTCTCGC   |
| D.mau | CTCCACCCCG | CCCCTCAACC | CAA--CG <b>CAA</b> | <b>CAATGTTGC</b>      | GCATTCTCGC   |
| D.sim | CTCCACCCCG | CCCCTCAACC | CAA--CG <b>CAA</b> | <b>CAATGTTGC</b>      | GCATTCTCGC   |
| D.ere | -----      | -----CC    | CGA--CG <b>CAA</b> | <b>CAATGTTGC</b> A    | CCATTCTCTC   |
| D.fuy | CCTGGT---- | -----      | -----              | <b>GCAA</b> CAATGTTGC | c gcagtcgctg |

|       |            |            |            |                  |            |
|-------|------------|------------|------------|------------------|------------|
| D.aur | -----      | -----      | CTCCGCGCAA | CAAAGTTGCa       | tccaagagtt |
| D.obs | atgtgca--- | -----      | -----      | ACAA CAATGTTGCA  | GGCGGCAagc |
| D.wil | -----      | ---CTCAACA | TTT--CACAA | CAATGTTGCA       | GGCGTTGgca |
| D.sal | -----      | ---CTCAACA | TTTcaCACAA | CAATGTTGCA       | GGCGTTGctg |
| Z.ghe | -----CAG-- | -----      | -----      | CCCAA CATTGTTGCA | GGCGGCAGTT |
| D.vir | -----      | -----      | -----      | CAA CAATGTTGCA   | GGCGGCTCTT |
| D.gri | -----      | -----      | -----      | -----            | -----GTT   |
| Z.vit |            |            |            | ACAA CATTGTTGCA  | GGCGGCAG   |

**Dsx2**

|       |                    |                  |                   |                   |                   |
|-------|--------------------|------------------|-------------------|-------------------|-------------------|
| D.mel | AC-----            | -----            | -----             | -----             | -----             |
| D.mau | AC-----            | -----            | -----             | -----             | -----             |
| D.sim | AC-----            | -----            | -----             | -----             | -----             |
| D.ere | AC-----            | -----            | -----             | -----             | -----             |
| D.fuy | -----              | -----            | -----             | -----             | -----             |
| D.aur | -----              | -----            | -----             | -----             | -----             |
| D.obs | agcaaccagc         | acttgcatte       | tcgcC-----        | -----             | -----             |
| D.wil | ttg <b>tcgctgc</b> | <b>tgctgcccc</b> | <b>ctcagtcgac</b> | <b>gtcagcagca</b> | <b>actg</b> ----- |
| D.sal | gttgcccgcc         | atgcccgttc       | tcgttcccgt        | tcccaatgtc        | ggcatctgct        |
| Z.ghe | -----              | -----            | -----             | -----             | -----             |
| D.vir | -----              | -----            | -----             | -----             | -----             |
| D.gri | -----              | -----            | -----             | -----             | -----             |

region III (+57 bp)

|       |            |                         |                     |            |            |
|-------|------------|-------------------------|---------------------|------------|------------|
| D.mel | -----      | -----                   | - <b>TTTAC</b> GAGG | CGTTTTT--- | -----TT    |
| D.mau | -----      | -----                   | - <b>TTTAC</b> GAGG | CG----T--- | -----TT    |
| D.sim | -----      | -----                   | - <b>TTTAC</b> GAGG | CG----T--- | -----TT    |
| D.ere | -----      | -----                   | - <b>TTTAC</b> GAGG | CG-----    | -----TTT   |
| D.fuy | -----C     | ATTCTCGCAC              | <b>TTTTAC</b> GAGG  | CG-----    | -----TTT   |
| D.aur | gcccTGCCGC | ATTCTCGCAC              | <b>TTTTAC</b> GAGG  | CGTTTTTTTT | CcccttaTTT |
| D.obs | -----      | ----TTGCAC              | <b>TTTTAC</b> GAGG  | CCTTGTT--- | -----TTTCT |
| D.wil | -----      | <b>GCTG CATT</b> TTGCAC | <b>TTTTAC</b> GAGG  | CATTTTG--- | -----TTTTT |
| D.sal | gttgctGCTG | CATTTTGCAC              | <b>TTTTAC</b> GAGG  | CATTtctttt | ttttTTTTTT |
| Z.ghe | --GTAAGTTG | CATTTGGCGC              | <b>TTTTAC</b> GATC  | CGTT-----  | -----      |
| D.vir | --GCAAcTTG | CATTTGACGA              | <b>TTTTAC</b> GAGC  | CATT-----  | -----      |
| D.gri | --GCAAGTTG | CATTTGACGC              | <b>TTTTAC</b> GAGC  | CATT-----  | -----      |

(ins III in D. mel)^ 11

|       |                     |                           |            |                    |                        |
|-------|---------------------|---------------------------|------------|--------------------|------------------------|
| D.mel | <b>TTTAT</b> ATCAC  | TTAC-----                 | -----      | -----              | <b>TTT ACT</b> TAGTTGA |
| D.mau | <b>TTTAT</b> ATCAC  | TTAC-----                 | -----      | -----              | <b>TTT ACT</b> TAGTTGA |
| D.sim | <b>TTTAT</b> ATCAC  | TTAC-----                 | -----      | -----              | <b>TTT ACT</b> TAGTTGA |
| D.ere | <b>TTTAT</b> ATCAC  | TT-----                   | -----      | -----              | ACTTAGTTGA             |
| D.fuy | <b>TTTAT</b> ATCAC  | TT-----                   | -----      | -----              | ACTTAGTTGA             |
| D.aur | <b>TTTAT</b> ATCAC  | TTAC-----                 | -----      | -----              | --TTAGTTGA             |
| D.obs | <b>TTTAT</b> ATCAC  | Tatgag----                | -----      | -----              | ACTT ACTTAGTTGA        |
| D.wil | TCCTTTTTTT <b>T</b> | <b>TTATT</b> <b>TTTAT</b> | ATGTATTTTT | <b>TATAT</b> CGCTT | ACTTAGTTGA             |
| D.sal | TTTGTTTTTT          | TTTTTTTTAT                | ATGga-TTTT | <b>TATAT</b> CGCTT | ACTTAGTTGA             |

|       |                    |       |       |           |            |
|-------|--------------------|-------|-------|-----------|------------|
| Z.ghe | <b>TTTAT</b> AT--- | ----- | ----- | -----GCTT | ACTTAGTTGA |
| D.vir | <b>TTTAT</b> AT--- | ----- | ----- | -----GCTT | ACTTAGTTGA |
| D.gri | <b>TTTAT</b> AT--- | ----- | ----- | -----GCTT | ACTTAGTTGA |

**12**

**13**

|       |            |            |            |            |             |
|-------|------------|------------|------------|------------|-------------|
| D.mel | TTAAGGGCGT | G-----     | GCCGAT-GGG | CCAGATAcaT | GCTTAGATTT  |
| D.mau | TTAAGGGCGT | G-----     | GCCGAT-GGG | CCAGATA--T | GCTTAGATTT  |
| D.sim | TTAAGGGCGT | G-----     | GCCGAT-GGG | CCAGATA--T | GCTTAGATTT  |
| D.ere | TTAAGGGCGT | G-----     | GCCGAT-GGG | CCAGATA--T | GCTTAGATTT  |
| D.fuy | TTAAGGGCGT | G-----     | GCCGAT-GGG | aaAGATA--T | GTTTAGATTT  |
| D.aur | TTAAGGGCGT | G-----     | GCCGAT-GGG | CCAGATA--T | GTTTAGATTT  |
| D.obs | TTAAGGGCGT | aaagggcgtg | GCCAAT-GAG | CCAGATA--T | tcaaaaggag  |
| D.wil | TTAAGGGCGT | G-----     | GCCAAT-TGG | GCAGATGCTT | AGATTCCCTAC |
| D.sal | TTAAGGGCGT | G-----     | GC-----    | -----      | -----       |
| Z.ghe | TTAAGGGCGT | G-----     | Gctg----AG | GCAGATGTTT | AGATTTCTAC  |
| D.vir | TTAAGGGCGT | G-----     | GCacttgaAG | GCAGATGTTT | AGATTTTTTCG |
| D.gri | TTAAGGGCGT | G-----     | GCCccaaTGG | GCAGATGTTT | AGATTTTCGCA |

|       |            |            |            |            |                   |
|-------|------------|------------|------------|------------|-------------------|
| D.mel | GCTCCAGC-- | -----      | -----AG    | TGGGCTGCAT | <b>TTTACGACC</b>  |
| D.mau | GCTCTAGC-- | -----      | -----      | -----GT    | <b>TTTACGACC</b>  |
| D.sim | GCTCTA---- | -----      | -----      | -----GCGT  | <b>TTTACGACC</b>  |
| D.ere | GCTCTATGTA | TCCcag---- | -----AGGAG | TGGGCTGCGT | <b>TTTACGACC</b>  |
| D.fuy | GCTCTTTGTA | TCCGgacatt | ctatcAGGAG | TGGGTGTCAT | <b>TTTACGACC</b>  |
| D.aur | GGTCTTTGTA | TCCGtcctaa | -----GAG   | TGGGCTGCAT | <b>TTTACGAGCC</b> |
| D.obs | ggaaaggaac | gggcttagat | ttcagtggaa | tggtgtaggc | agggattgag        |
| D.wil | aggccaaaat | gtaggcgtaa | gagaatgtga | aacgtgtgtg | gcg-----          |
| D.sal | -----      | -----      | -----      | -----      | -----             |
| Z.ghe | caccactaca | -----      | GCAACAGCAA | CAACAACACT | AACAGTTACA        |
| D.vir | CACAGgCTAT | GACTACAACA | AAAATAAAAA | GAAAtacaac | aacta-----        |
| D.gri | CACAG-CTAT | TACTACAATA | ACAACAATAT | CAAAAGCAAC | AACAACAACA        |

**14**

|       |             |                   |                    |                    |                    |
|-------|-------------|-------------------|--------------------|--------------------|--------------------|
| D.mel | TCAAAACCCG  | ATCCAAAT--        | -----GAAA          | ATATGAAAt          | ac-----            |
| D.mau | TCAAAACCCG  | AACCAAAT--        | -----AGAAA         | ATATGAAA--         | -----              |
| D.sim | TCAAAACCCG  | ATCCAAAT--        | -----GAAA          | ATATGAAA--         | -----              |
| D.ere | TCGAAACCCG  | ATCGAAtcgg        | aaaggAGAAA         | ATATGAAA--         | -----              |
| D.fuy | GCCAAAGCCG  | ATCAAAAC--        | -----GAAA          | cagaaga---         | AATATGAAAT         |
| D.aur | TCGAAAGGTG  | ATCGAAAT--        | -----Ggcta         | cggaaagagg         | AATATCAAAT         |
| D.obs | gggagtaata  | acat <b>TTTAT</b> | <b>GACC</b> ttacag | agatacagat         | acagaaatat         |
| D.wil | -----       | -----             | -----              | -----              | -----              |
| D.sal | -----       | -----             | -----              | -----              | -----              |
| Z.ghe | ACATCTATTG  | TGGCGTGCAA        | ATGCCGACGA         | TGAG <b>TTTTAC</b> | <b>GACC</b> AACAGA |
| D.vir | -----       | TGGCGTGCTA        | ATGCCCCCGA         | TGAG <b>TTTTAC</b> | <b>GACC</b> g----- |
| D.gri | ACAACAACATA | TGGCGTGCTA        | ACGCCGCCAA         | TGAG <b>TTTTAT</b> | <b>GGCC</b> AACAAA |

**14**

**14**



|       |                  |                   |                   |             |            |
|-------|------------------|-------------------|-------------------|-------------|------------|
| D.mel | -----G <b>GC</b> | <b>TAATCCGCTT</b> | <b>ATGAGCACAA</b> | CAAAttgggtt | CACACACTTC |
| D.mau | -----TGGC        | TAATCCGCTT        | ATGAGCACAA        | CAAATGTGTA  | CACACACTCC |
| D.sim | -----TGGC        | TAATCCGCTT        | ATGAGCACAA        | CAAATGTGTA  | CACACACTCC |
| D.ere | -----TGGG        | TAATCCGCTT        | ATGGGCACAA        | CAAAAAGATA  | CACTCACTTC |
| D.fuy | GGCCTCTGGG       | TAATCCGCTT        | ATGGTTATAA        | CAATATTata  | gaaatttcga |
| D.aur | GGTTTCGAGG       | TAATCCGCTT        | Acgaaatgag        | ctccttagaa  | tcctcacact |
| D.obs | tggaaggaaa       | tgaaggagtg        | cgatccactg        | aatccgaatc  | acttttgaat |
| D.wil | -----            | -----             | -----             | -----       | -----      |
| D.sal | -----            | -----             | -----             | -----       | -----      |
| Z.ghe | AAATACAACA       | agaaaacc--        | -----             | -----       | -----      |
| D.vir | --CAAATACA       | ACAAAAACA         | AAAAAAaag         | gaaTTTATTT  | TGAAAA---- |
| D.gri | TACAAATACA       | ACAAAAGAAA        | AAAAAAatc-        | ---TTTATTT  | TCAAAA---- |

**<(dimorphic element mel Rvs primer)**

t

|       |            |            |            |            |            |
|-------|------------|------------|------------|------------|------------|
| D.mel | GATCGAAATT | ACTTGCGATC | GCCATTTGAT | TGGTTTCAAT | GTATTGCTTT |
| D.mau | GATCGAAATT | ACTTGCAATC | GCATTTTAAt | gtt-----   | ---TTACTTT |
| D.sim | GATCGAAATT | ACTTGTGATC | GCATTTTAAG | TGGTTTCAGT | GTATT-CTTT |
| D.ere | GATCGAAATC | ACCTGCGATC | GCATTTTAAG | TGGCTTCAGT | TTATTGATTC |
| D.fuy | taagatttga | aataagatct | ttttttgact | attaaatggt | ttcaatccac |
| D.aur | gtgatcacag | ctgaattatt | gccatactta | tatctgacat | taaaaattct |
| D.obs | tctgaaaagt | agcaagAAGT | TGCAAAATTT | CTGGTAGCCG | CTACAttca  |
| D.wil | -----      | -----      | -----      | -----      | -----      |
| D.sal | -----      | -----      | -----      | -----      | -----      |
| Z.ghe | -----      | -----AAGT  | TTCGAAATTT | GTTGTATGAG | CTGCACAAAT |
| D.vir | -----      | -----      | -----      | --TGTATGTG | CAGCACAAAT |
| D.gri | -----      | -----      | -----      | --TGTtgca- | --GCAGAAAT |

|       |            |            |             |            |            |
|-------|------------|------------|-------------|------------|------------|
| D.mel | AACTGGCAGG | -----      | -----       | -----      | -----      |
| D.mau | AACTAGCAGG | -----      | -----       | -----      | -----      |
| D.sim | AACTAGCAGA | -----      | -----       | -----      | -----      |
| D.ere | AACTAGCAGG | -----      | -----       | -----      | -----      |
| D.fuy | tgccttttga | taatggttaa | t-----      | -----      | -----      |
| D.aur | cttgtttacc | ttatttttaa | tgaccttaat  | tactgcctta | gttataactt |
| D.obs | ctacctctcc | ctcttccatt | gtggccttagc | agtacctctt | tctttatcta |
| D.wil | -----      | -----      | -----       | -----      | -----      |
| D.sal | -----      | -----      | -----       | -----      | -----      |
| Z.ghe | ATTTTTATCA | CAaactagtc | aaatgttata  | gtaactgtta | taagtgtgag |
| D.vir | ATTTTTATTA | CACCTACTCT | AATACAcaca  | caccacacc  | cacacagata |
| D.gri | ATTTTTATTA | CACCTCCTCT | AATACAttc   | tcactcacac | atgtacatat |

|       |            |             |            |            |       |
|-------|------------|-------------|------------|------------|-------|
| D.mel | -----      | -----       | -----      | -----      | ----- |
| D.mau | -----      | -----       | -----      | -----      | ----- |
| D.sim | -----      | -----       | -----      | -----      | ----- |
| D.ere | -----      | -----       | -----      | -----      | ----- |
| D.fuy | -----      | -----       | -----      | -----      | ----- |
| D.aur | acataaatgg | gacttttattt | aacaggtttc | ggtggaa--- | ----- |

|       |            |            |             |            |            |
|-------|------------|------------|-------------|------------|------------|
| D.obs | cggatttctc | gaaacttctt | taatttcgtg  | agagttctcc | gtcagcgtaa |
| D.wil | -----      | -----      | -----       | -----      | -----      |
| D.sal | -----      | -----      | -----       | -----      | -----      |
| Z.ghe | tttcatccaa | aaacgaactc | tgttcgattc  | ccattatgct | gtcataaatc |
| D.vir | tatagtatgc | catacctagt | cctgactttc  | atztatagcc | aga-----   |
| D.gri | ttatatatat | atatatatat | atatatatgt  | ttatatatat | atatatctat |
| D.mel | -----      | -----      | -----       | -----      | -----      |
| D.mau | -----      | -----      | -----       | -----      | -----      |
| D.sim | -----      | -----      | -----       | -----      | -----      |
| D.ere | -----      | -----      | -----       | -----      | -----      |
| D.fuy | -----      | -----      | -----       | -----      | -----      |
| D.aur | -----      | -----      | -----       | -----      | -----      |
| D.obs | ttccattgcc | cattcccatt | acgaaccaac  | gaaatgctac | gcttcgaggc |
| D.wil | -----      | -----      | -----       | -----      | -----      |
| D.sal | -----      | -----      | -----       | -----      | -----      |
| Z.ghe | c-----     | -----      | -----       | -----      | -----      |
| D.vir | -----      | -----      | -----       | -----      | ---TACACTT |
| D.gri | atatatgtat | gtacattcac | ataticgtata | cctggccgtg | actTACACAT |
| D.mel | -----      | -----      | -----       | -----      | -----      |
| D.mau | -----      | -----      | -----       | -----      | -----      |
| D.sim | -----      | -----      | -----       | -----      | -----      |
| D.ere | -----      | -----      | -----       | -----      | -----      |
| D.fuy | -----      | -----      | -----       | -----      | -----      |
| D.aur | -----      | -----      | -----       | -----      | -----      |
| D.obs | g-----     | -----      | -----       | -----      | -----      |
| D.wil | -----      | -----      | -----       | -----      | -----      |
| D.sal | -----      | -----      | -----       | -----      | -----      |
| Z.ghe | -----      | -----      | -----       | -----      | -----      |
| D.vir | TTGTTATTTA | Ttactttacc | ataataaaaa  | gaattatact | gaaaacattt |
| D.gri | TTGTAATTTA | Tgagtgaagc | catcataaac  | cgatatacaa | agagaaacca |
| D.mel | -----      | -----      | -----       | -----      | -----      |
| D.mau | -----      | -----      | -----       | -----      | -----      |
| D.sim | -----      | -----      | -----       | -----      | -----      |
| D.ere | -----      | -----      | -----       | -----      | -----      |
| D.fuy | -----      | -----      | -----       | -----      | -----      |
| D.aur | -----      | -----      | -----       | -----      | -----      |
| D.obs | -----      | -----      | -----       | -----      | -----      |
| D.wil | -----      | -----      | -----       | -----      | -----      |
| D.sal | -----      | -----      | -----       | -----      | -----      |
| Z.ghe | -----      | -----      | -----       | -----      | -----      |
| D.vir | catgaaagaa | aaataactaa | agaaaaaaaa  | tataataata | ataataaatt |
| D.gri | tataggaagg | taccagaagg | gcaaagaatt  | gatgtgcaac | taaaacgaat |

|       |            |            |            |            |            |
|-------|------------|------------|------------|------------|------------|
| D.mel | -----      | -----      | -----      | -----      | -----      |
| D.mau | -----      | -----      | -----      | -----      | -----      |
| D.sim | -----      | -----      | -----      | -----      | -----      |
| D.ere | -----      | -----      | -----      | -----      | -----      |
| D.fuy | -----      | -----      | -----      | -----      | -----      |
| D.aur | -----      | -----      | -----      | -----      | -----      |
| D.obs | -----      | -----      | -----      | -----      | -----      |
| D.wil | -----      | -----      | -----      | -----      | -----      |
| D.sal | -----      | -----      | -----      | -----      | -----      |
| Z.ghe | -----      | -----      | -----      | -----      | -----      |
| D.vir | atggaaaatt | gcaaaggaag | cgcttaagaa | aaataagtca | ataaagtata |
| D.gri | aaataaaaaa | cttgagcaac | aacttaaagg | ggtaaatac  | actaaaaatt |

|       |            |            |            |            |            |
|-------|------------|------------|------------|------------|------------|
| D.mel | -----      | -----      | -----      | -----      | -----      |
| D.mau | -----      | -----      | -----      | -----      | -----      |
| D.sim | -----      | -----      | -----      | -----      | -----      |
| D.ere | -----      | -----      | -----      | -----      | -----      |
| D.fuy | -----      | -----      | -----      | -----      | -----      |
| D.aur | -----      | -----      | -----      | -----      | -----      |
| D.obs | -----      | -----      | -----      | -----      | -----      |
| D.wil | -----      | -----      | -----      | -----      | -----      |
| D.sal | -----      | -----      | -----      | -----      | -----      |
| Z.ghe | -----      | -----      | -----      | -----      | -----      |
| D.vir | cgtgtatata | tatagaacta | aatgaaaata | aaacacatac | ttttatattt |
| D.gri | caattataga | atagatgcaa | caaataataa | agtttttc-- | -----      |

|       |            |            |            |            |            |
|-------|------------|------------|------------|------------|------------|
| D.mel | -----      | -----      | -----      | -----      | -----      |
| D.mau | -----      | -----      | -----      | -----      | -----      |
| D.sim | -----      | -----      | -----      | -----      | -----      |
| D.ere | -----      | -----      | -----      | -----      | -----      |
| D.fuy | -----      | -----      | -----      | -----      | -----      |
| D.aur | -----      | -----      | -----      | -----      | -----      |
| D.obs | -----      | -----      | -----      | -----      | -----      |
| D.wil | -----      | -----      | -----      | -----      | -----      |
| D.sal | -----      | -----      | -----      | -----      | -----      |
| Z.ghe | -----      | -----      | -----      | -----      | -----      |
| D.vir | acttctttct | gaaaaaatac | aaattctcgg | gcttgttcca | tagtatttct |
| D.gri | -----      | -----      | -----      | -----      | -----      |

|       |       |       |         |        |        |
|-------|-------|-------|---------|--------|--------|
| D.mel | ----- | ----- | -----   | -----  | -----  |
| D.mau | ----- | ----- | -----   | -----  | -----  |
| D.sim | ----- | ----- | -----   | -----  | -----  |
| D.ere | ----- | ----- | -----   | -----  | -----  |
| D.fuy | ----- | ----- | -----   | -----  | -----  |
| D.aur | ----- | ----- | -----   | -----  | -----  |
| D.obs | ----- | ----- | -----   | -----  | -----  |
| D.wil | ----- | ----- | -----TG | -----T | -----A |

|       |            |            |            |            |            |
|-------|------------|------------|------------|------------|------------|
| D.sal | -----      | -----      | -----      | -----      | -----      |
| Z.ghe | -----      | -----      | -----      | -----      | -----      |
| D.vir | ggagaattgg | agaaagattt | aaactaTGTA | GAAATTGAAC | TCATTTTAAT |
| D.gri | -----      | -----      | -----      | -----      | ---TTGTAAT |

|       |            |            |            |            |            |
|-------|------------|------------|------------|------------|------------|
| D.mel | -----      | -----      | -----      | -----      | -----      |
| D.mau | -----      | -----      | -----      | -----      | -----      |
| D.sim | -----      | -----      | -----      | -----      | -----      |
| D.ere | -----      | -----      | -----      | -----      | -----      |
| D.fuy | -----      | -----      | -----      | -----      | -----      |
| D.aur | -----      | -----      | -----      | -----      | -----      |
| D.obs | -----      | -----      | -----      | -----      | -----      |
| D.wil | GAGAAATGAC | TAAATTTggt | gttttgcttt | tgtttttggt | ttttcttttc |
| D.sal | -----      | -----      | -----      | -----      | -----      |
| Z.ghe | -----      | -----      | -----      | -----      | -----      |
| D.vir | tttttttaaa | tcaatatttt | gcaagcctaa | aatgcctgct | aaacaaaggt |
| D.gri | TTGAAATAAG | TAAATTTaat | atattcagaa | gaggaaccta | ccccaaaaat |

|       |            |            |            |            |            |
|-------|------------|------------|------------|------------|------------|
| D.mel | -----      | -----      | -----      | -----      | -----      |
| D.mau | -----      | -----      | -----      | -----      | -----      |
| D.sim | -----      | -----      | -----      | -----      | -----      |
| D.ere | -----      | -----      | -----      | -----      | -----      |
| D.fuy | -----      | -----      | -----      | -----      | -----      |
| D.aur | -----      | -----      | -----      | -----      | -----      |
| D.obs | -----      | -----      | -----      | -----      | -----      |
| D.wil | ctactgctaa | ttactcctac | taaaaaggag | tagccaccat | gacaaattaa |
| D.sal | -----      | -----      | -----      | -----      | -----      |
| Z.ghe | -----      | -----      | -----      | -----      | -----      |
| D.vir | gttttttctt | tatatataaa | gaatatgttt | tcaatataaa | tgcatttgta |
| D.gri | atgttaactc | tagcttgaaa | attgtgagag | atacaattgg | tcttatcgat |

|       |            |            |            |                    |                    |
|-------|------------|------------|------------|--------------------|--------------------|
| D.mel | -----      | -----      | -----      | -----              | -----              |
| D.mau | -----      | -----      | -----      | -----              | -----              |
| D.sim | -----      | -----      | -----      | -----              | -----              |
| D.ere | -----      | -----      | -----      | -----              | -----              |
| D.fuy | -----      | -----      | -----      | -----              | -----              |
| D.aur | -----      | -----      | -----      | -----              | -----              |
| D.obs | -----      | -----      | -----      | -----              | -----              |
| D.wil | gacattaat  | aagcactaac | aaagcaatTG | Atg <b>TTTACTA</b> | <b>CC</b> aaaaattA |
| D.sal | -----      | -----      | -----      | -----              | -----              |
| Z.ghe | -----      | -----      | -----      | -----              | -----A             |
| D.vir | aatattaac  | aataaagtta | aaaatccaat | tgtacattat         | tgttgattct         |
| D.gri | ttgcacttat | cgatgtaatc | aatttcccag | acccacacat         | gttaaaactt         |

|       |       |       |       |       |       |
|-------|-------|-------|-------|-------|-------|
| D.mel | ----- | ----- | ----- | ----- | ----- |
| D.mau | ----- | ----- | ----- | ----- | ----- |

|       |            |            |            |            |            |
|-------|------------|------------|------------|------------|------------|
| D.sim | -----      | -----      | -----      | -----      | -----      |
| D.ere | -----      | -----      | -----      | -----      | -----      |
| D.fuy | -----      | -----      | -----      | -----      | -----      |
| D.aur | -----      | -----      | -----      | -----      | -----      |
| D.obs | -----      | -----      | -----      | -----      | -----      |
| D.wil | AAACACAAAA | GAATGAAAGA | AAAcaaaaac | ttttctagca | ttacggcgcc |
| D.sal | -----      | -----      | -----      | -----      | -----      |
| Z.ghe | ATATACAAAA | CAATGAAACA | GAAaccccc  | aaaaaccca  | acagaat    |
| D.vir | aagtaaatta | at         | caatcatatt | tcaattaaat | tttattg    |
| D.gri | tatctgatct | ggacatagtc | gaatata    | taaaagtttc | aagttctgtt |

|       |            |            |            |            |           |
|-------|------------|------------|------------|------------|-----------|
| D.mel | -----      | -----      | -----      | -----      | -----     |
| D.mau | -----      | -----      | -----      | -----      | -----     |
| D.sim | -----      | -----      | -----      | -----      | -----     |
| D.ere | -----      | -----      | -----      | -----      | -----     |
| D.fuy | -----      | -----      | -----      | -----      | -----     |
| D.aur | -----      | -----      | -----      | -----      | -----     |
| D.obs | -----      | -----      | --AGCAA--  | -----      | -----     |
| D.wil | attggcgcca | aattgacaaa | at         | atttctacat | tttttttct |
| D.sal | -----      | -----      | -----      | -----      | -----     |
| Z.ghe | ctttctttcg | cattatcacg | aaAGCAG--- | -----      | -----     |
| D.vir | attctgggta | agacaaaaga | atataaacta | catatcttca | aaatttaa  |
| D.gri | ttaccttcca | tggaagagta | ataaaaacaa | aacaaagctt | tcttcaat  |

|       |            |            |            |            |          |
|-------|------------|------------|------------|------------|----------|
| D.mel | -----      | -----      | -----      | -----      | -----    |
| D.mau | -----      | -----      | -----      | -----      | -----    |
| D.sim | -----      | -----      | -----      | -----      | -----    |
| D.ere | -----      | -----      | -----      | -----      | -----    |
| D.fuy | -----      | -----      | -----      | -----      | -----    |
| D.aur | -----      | -----      | -----      | -----      | -----    |
| D.obs | -----      | -----      | -----      | -----      | -----    |
| D.wil | tttctattga | accatctagc | agtcacttca | actaatagat | agt----- |
| D.sal | -----      | -----      | -----      | -----      | -----    |
| Z.ghe | -----      | -----      | -----      | -----      | -----    |
| D.vir | taacatcaat | aattcggaaa | taaatatagt | taaagaaaa  | caaattaa |
| D.gri | -----      | -----      | -----      | -----      | -----    |

|       |       |       |       |       |            |
|-------|-------|-------|-------|-------|------------|
| D.mel | ----- | ----- | ----- | ----- | -----      |
| D.mau | ----- | ----- | ----- | ----- | -----      |
| D.sim | ----- | ----- | ----- | ----- | -----      |
| D.ere | ----- | ----- | ----- | ----- | -----      |
| D.fuy | ----- | ----- | ----- | ----- | -----      |
| D.aur | ----- | ----- | ----- | ----- | -----      |
| D.obs | ----- | ----- | ----- | ----- | -----      |
| D.wil | ----- | ----- | ----- | ----- | --TAAGAACT |
| D.sal | ----- | ----- | ----- | ----- | -----      |
| Z.ghe | ----- | ----- | ----- | ----- | -----      |

|       |            |            |            |            |            |
|-------|------------|------------|------------|------------|------------|
| D.vir | gcaattaatt | ttaaatttaa | atagctttgt | attaaattgc | acTAAGAACT |
| D.gri | -----      | -----      | -----      | -----      | -----      |
| D.mel | -----      | -----      | -----      | -----      | -----      |
| D.mau | -----      | -----      | -----      | -----      | -----      |
| D.sim | -----      | -----      | -----      | -----      | -----      |
| D.ere | -----      | -----      | -----      | -----      | -----      |
| D.fuy | -----      | -----      | -----      | -----      | -----      |
| D.aur | -----      | -----      | -----      | -----      | -----      |
| D.obs | -----      | -----      | -----      | -----      | -----      |
| D.wil | AAAGGAATTG | AAATTTTGAT | acttatagtt | tctagtctcg | ttaggttaa  |
| D.sal | -----      | -----      | -----      | -----      | -----      |
| Z.ghe | -----      | -----      | -----      | -----      | -----      |
| D.vir | AAAAAAGTT  | AATTATTGTT | gcttagttta | actaaaaca  | atgaaattgc |
| D.gri | -----      | -----      | -----      | -----      | -----      |
| D.mel | -----TGAA  | CACTTTGTTT | -----      | --TTTATCTA | ACGATTCTTA |
| D.mau | -----TGAA  | CACTTTGTTG | ttaccttact | atTTAC-CTT | ACTATTCTTA |
| D.sim | -----TGAA  | CACTTGGTTG | -----      | --TTAC-CTT | ACTATTCTTA |
| D.ere | -----TGAA  | AATCGGGCTT | -----      | --TGAG-CTA | ACGATTGCCA |
| D.fuy | -----      | -----      | -----      | -----      | -----      |
| D.aur | -----      | -----      | -----      | -----      | -----      |
| D.obs | -----      | -----      | -----      | -----      | -----      |
| D.wil | ctaattTGAG | CACTTTCTTT | -----      | --CTTATCac | tgattaagag |
| D.sal | -----      | -----      | -----      | -----      | -----      |
| Z.ghe | -----      | -----      | -----      | -----      | -----      |
| D.vir | attacgtatt | tagaaaaaca | attattcata | tatttttt-- | -----      |
| D.gri | -----      | -----      | -----      | -----      | -----      |
| D.mel | CTATTTAATA | TCCTAGTCAA | TTAATGTATT | TTCCACTACT | TCCATCGATA |
| D.mau | CTATTTGTTG | TCCTAGTCAA | TTAATGTATT | TTCCAGTACT | TCTATCGATA |
| D.sim | CTATTTGTTG | TCCTAGTCAA | TTAATGTATT | TTCCGGTACT | TCCATCGATA |
| D.ere | CTATTTGTTG | TCCAAGTCCC | TTAAAGTATT | TTCCAGTACT | TCTgcgtttt |
| D.fuy | -----      | -----      | -----      | -----      | -----      |
| D.aur | -----      | -----      | -----      | -----      | -----      |
| D.obs | -----      | -----      | -----      | -----      | -----      |
| D.wil | agattgtttt | ttaaagtata | tcgaatgact | ctttagacaa | atagtaTTAA |
| D.sal | -----      | -----      | -----      | -----      | -----      |
| Z.ghe | -----      | -----      | -----      | -----      | -----      |
| D.vir | -----      | -----      | -----      | -----      | -----TTAT  |
| D.gri | -----      | -----      | -----      | -----      | -----      |
| D.mel | Tcacagagtt | cccatt---- | -----      | -----      | -----      |
| D.mau | TTCCCAACCC | C-----     | -----      | -----      | -----      |
| D.sim | TTCCCAACCC | A-----     | -----      | -----      | -----      |
| D.ere | ccgtccatcc | atattcatgg | ccaccttttc | gaag-----  | -----      |
| D.fuy | -----      | -----      | -----      | -----      | -----      |

|       |            |             |            |            |            |
|-------|------------|-------------|------------|------------|------------|
| D.aur | -----ATTTG | ATTAGAATGG  | AAGTTTTAAg | ggatttttta | ataagccact |
| D.obs | -----      | -----       | -----      | -----      | -----      |
| D.wil | GTACTATTTA | ATTAGTATTT  | AAATTTTAAa | accttaaadc | tatctatata |
| D.sal | -----      | -----       | -----      | -----      | -----      |
| Z.ghe | -----      | -----       | -----      | -----      | -----      |
| D.vir | GTATTATTTA | ATTTATATAT  | CAATTACatc | tttgtattta | ctctaagga  |
| D.gri | ---TACTTA  | AGTTTCATAT  | TAATTACcaa | agaatcactt | ggtcttcgcc |
| D.mel | -----      | -----       | -----      | -----      | -----      |
| D.mau | -----      | -----       | -----      | -----      | -----      |
| D.sim | -----      | -----       | -----      | -----      | -----      |
| D.ere | -----      | -----       | -----      | -----      | -----      |
| D.fuy | -----      | -----       | -----      | -----      | -----      |
| D.aur | aagaaathtt | acaggttact  | tggttatttg | cagtattaac | gttggaaacc |
| D.obs | -----      | -----       | -----      | -----      | -----      |
| D.wil | taagtaaact | gatgtataag  | ttttaatctt | aataaagttc | ctaaataaag |
| D.sal | -----      | -----       | -----      | -----      | -----      |
| Z.ghe | -----      | -----       | -----      | -----      | -----      |
| D.vir | aagttaagtt | acctttacct  | tagggtatht | tgagtacgaa | ttaggcttgt |
| D.gri | tttagttggg | acagcgcac   | attgattcaa | tatacgctgc | agctaactat |
| D.mel | -----      | -----       | -----      | -----      | -----      |
| D.mau | -----      | -----       | -----      | -----      | -----      |
| D.sim | -----      | -----       | -----      | -----      | -----      |
| D.ere | -----      | -----       | -----      | -----      | -----      |
| D.fuy | -----      | -----       | -----      | -----      | -----      |
| D.aur | taaacaatht | ttctgttaaa  | aatat----- | -----      | ----ATTTTA |
| D.obs | -----      | -----       | -----      | -----      | -----      |
| D.wil | gattattcat | cgttttctgt  | attaaaacct | gataaaagta | aacaATTTTA |
| D.sal | -----      | -----       | -----      | -----      | -----      |
| Z.ghe | -----      | -----       | -----      | -----      | -----      |
| D.vir | ttggttttct | atagcaataa  | aagaaacca  | tcaactat-- | -----      |
| D.gri | tctaggggat | gttaaatgcc  | atttgggatt | gtttgtttta | ttgtggcacg |
| D.mel | -----      | -----       | -----      | -----      | -----      |
| D.mau | -----      | -----       | -----      | -----      | -----      |
| D.sim | -----      | -----       | -----      | -----      | -----      |
| D.ere | -----      | -----       | -----      | -----      | -----      |
| D.fuy | -----      | -----       | -----      | -----      | -----      |
| D.aur | AACATAATTT | AATAAATTTa  | ttaaatagca | agattgagag | ctcatgaatt |
| D.obs | -----      | -----       | -----      | -----      | -----      |
| D.wil | GAAACGATTT | TATAAATTTcg | aaactaacac | atcctagaat | tattgctctc |
| D.sal | -----      | -----       | -----      | -----      | -----      |
| Z.ghe | -----      | -----       | -----      | -----      | -----      |
| D.vir | -----      | -----       | -----      | -----      | -----      |
| D.gri | aaa-----   | -----       | -----      | -----      | -----      |

|       |            |            |            |            |            |
|-------|------------|------------|------------|------------|------------|
| D.mel | -----      | -----      | -----      | -----      | -----      |
| D.mau | -----      | -----      | -----      | -----      | -----      |
| D.sim | -----      | -----      | -----      | -----      | -----      |
| D.ere | -----      | -----      | -----      | -----      | -----      |
| D.fuy | ----TTGGTT | -----      | -----      | -----      | -----      |
| D.aur | ttgcTTGTTT | -----      | -----      | -----      | -----      |
| D.obs | -----      | -----      | -----      | -----      | -----      |
| D.wil | tgctctttc  | tctctaattt | tacttaaata | ctttactgga | gaaggaccat |
| D.sal | -----      | -----      | -----      | -----      | -----      |
| Z.ghe | -----      | -----      | -----      | -----      | -----      |
| D.vir | -----      | -----      | -----      | -----      | -----      |
| D.gri | -----      | -----      | -----      | -----      | -----      |

|       |           |           |            |            |            |
|-------|-----------|-----------|------------|------------|------------|
| D.mel | -----     | -----     | -----      | -----      | -----      |
| D.mau | -----     | -----     | -----      | -----      | -----      |
| D.sim | -----     | -----     | -----      | -----      | -----      |
| D.ere | -----     | -----     | -----      | -----      | -----      |
| D.fuy | -----     | -----     | ---TAAAATT | GTAAATGTTc | agtttccgat |
| D.aur | -----     | -----     | ---AAATATT | TTAAATGTTT | Taaaattaaa |
| D.obs | -----     | -----     | -----      | -----      | -----      |
| D.wil | tggaattgt | aatcatttg | aagAAATATT | TTAAGTTTTT | Tcagataact |
| D.sal | -----     | -----     | -----      | -----      | -----      |
| Z.ghe | -----     | -----     | -----      | -----      | -----      |
| D.vir | -----     | -----     | -----      | -----      | -----      |
| D.gri | -----     | -----     | -----      | -----      | -----      |

|       |            |            |            |            |            |
|-------|------------|------------|------------|------------|------------|
| D.mel | -----      | -----      | -----      | -----      | -----      |
| D.mau | -----      | -----      | -----      | -----      | -----      |
| D.sim | -----      | -----      | -----      | -----      | -----      |
| D.ere | -----      | -----      | -----      | -----      | -----      |
| D.fuy | taatttctat | cagccattt  | tataagaaag | tttttttttg | ctatttgcct |
| D.aur | ttagaagcat | gataaatttt | taaataatac | cactacgttt | taaagccaat |
| D.obs | -----      | -----      | -----      | -----      | -----      |
| D.wil | aaaactatta | tttgagaatt | caaaaaaaca | tttcttaatc | ctacacaaaa |
| D.sal | -----      | -----      | -----      | -----      | -----      |
| Z.ghe | -----      | -----      | -----      | -----      | -----      |
| D.vir | -----      | -----      | -----      | -----      | -----      |
| D.gri | -----      | -----      | -----      | -----      | -----      |

|       |            |            |            |            |            |
|-------|------------|------------|------------|------------|------------|
| D.mel | -----      | -----      | -----      | -----      | -----      |
| D.mau | -----      | -----      | -----      | -----      | -----      |
| D.sim | -----      | -----      | -----      | -----      | -----      |
| D.ere | -----      | -----      | -----      | -----      | -----      |
| D.fuy | ttttgttttt | caaattaatt | tctaggatat | attaaacatt | ctgtattttt |
| D.aur | ttaagtgccg | atthtatttt | gtagatttta | ttacaaagtc | aggttctaaa |
| D.obs | -----      | -----      | -----      | -----      | -----      |
| D.wil | aaagacttaa | tttacattat | ttattgaata | gagatataag | tttatctcac |



D.sal -----  
Z.ghe -----  
D.vir -----  
D.gri -----

D.mel -----  
D.mau -----  
D.sim -----  
D.ere -----  
D.fuy aaccattctt tcaataaata cttttcttta tagactaatt -----  
D.aur gtctacaatt ttagttcggg ttaatcacct taactccata accatgccaa  
D.obs -----  
D.wil ttttaagtta tatggacttt atctgttaaa acaataagaa agaatcattc  
D.sal -----  
Z.ghe -----  
D.vir -----  
D.gri -----

D.mel -----  
D.mau -----  
D.sim -----  
D.ere -----  
D.fuy -----  
D.aur gtgaaatctt tccgctagta tcttataaaa atggtgttct acaaatgggtg  
D.obs -----  
D.wil gctatatggg taagattggg tcctatgaaa atttcaaatg aaaaaagttt  
D.sal -----  
Z.ghe -----  
D.vir -----  
D.gri -----

D.mel -----  
D.mau -----  
D.sim -----  
D.ere -----  
D.fuy -----  
D.aur ttttatttcc caggccttga ggtgata--- -----  
D.obs -----  
D.wil tatatacata tattcaactg gaataagttt tattgtacaa gtaaaattga  
D.sal -----  
Z.ghe -----  
D.vir -----  
D.gri -----

D.mel -----  
D.mau -----  
D.sim -----

|       |            |            |            |            |            |
|-------|------------|------------|------------|------------|------------|
| D.ere | -----      | -----      | -----      | -----      | -----      |
| D.fuy | -----      | -----      | -----      | -----      | -----      |
| D.aur | -----      | -----      | -----      | -----      | -----      |
| D.obs | -----      | -----      | -----      | -----      | -----      |
| D.wil | aatattggca | cgaattgtca | caagaacaga | tacatatatt | ttgcaaacca |
| D.sal | -----      | -----      | -----      | -----      | -----      |
| Z.ghe | -----      | -----      | -----      | -----      | -----      |
| D.vir | -----      | -----      | -----      | -----      | -----      |
| D.gri | -----      | -----      | -----      | -----      | -----      |

|       |            |            |            |            |            |
|-------|------------|------------|------------|------------|------------|
| D.mel | -----      | -----      | -----      | -----      | -----      |
| D.mau | -----      | -----      | -----      | -----      | -----      |
| D.sim | -----      | -----      | -----      | -----      | -----      |
| D.ere | -----      | -----      | -----      | -----      | -----      |
| D.fuy | -----      | -----      | -----      | -----      | -----      |
| D.aur | -----      | -----      | -----      | -----      | -----      |
| D.obs | -----      | -----      | -----      | -----      | -----      |
| D.wil | aaaacaatca | aaggatattt | cattactact | gaaatgaatt | atagctgatt |
| D.sal | -----      | -----      | -----      | -----      | -----      |
| Z.ghe | -----      | -----      | -----      | -----      | -----      |
| D.vir | -----      | -----      | -----      | -----      | -----      |
| D.gri | -----      | -----      | -----      | -----      | -----      |

|       |             |            |            |            |            |
|-------|-------------|------------|------------|------------|------------|
| D.mel | -----       | -----      | -----      | -----      | -----      |
| D.mau | -----       | -----      | -----      | -----      | -----      |
| D.sim | -----       | -----      | -----      | -----      | -----      |
| D.ere | -----       | -----      | -----      | -----      | -----      |
| D.fuy | -----       | -----      | -----      | -----      | -----      |
| D.aur | -----       | -----      | -----      | -----      | -----      |
| D.obs | -----       | -----      | -----      | -----      | -----      |
| D.wil | aaattggttag | ctaaagtttt | atttactttt | cagaaatcat | taattatatt |
| D.sal | -----       | -----      | -----      | -----      | -----      |
| Z.ghe | -----       | -----      | -----      | -----      | -----      |
| D.vir | -----       | -----      | -----      | -----      | -----      |
| D.gri | -----       | -----      | -----      | -----      | -----      |

|       |            |            |            |            |            |
|-------|------------|------------|------------|------------|------------|
| D.mel | -----      | -----      | -----      | -----      | -----      |
| D.mau | -----      | -----      | -----      | -----      | -----      |
| D.sim | -----      | -----      | -----      | -----      | -----      |
| D.ere | -----      | -----      | -----      | -----      | -----      |
| D.fuy | -----      | -----      | -----      | -----      | -----      |
| D.aur | -----      | -----      | -----      | -----      | -----      |
| D.obs | -----      | -----      | -----      | -----      | -----      |
| D.wil | cgtatggggt | ataaaaactg | atttcttacg | tatttcatat | gcgttgagat |
| D.sal | -----      | -----      | -----      | -----      | -----      |
| Z.ghe | -----      | -----      | -----      | -----      | -----      |
| D.vir | -----      | -----      | -----      | -----      | -----      |

|       |            |            |            |            |            |
|-------|------------|------------|------------|------------|------------|
| D.gri | -----      | -----      | -----      | -----      | -----      |
| D.mel | -----      | -----      | -----      | -----      | -----      |
| D.mau | -----      | -----      | -----      | -----      | -----      |
| D.sim | -----      | -----      | -----      | -----      | -----      |
| D.ere | -----      | -----      | -----      | -----      | -----      |
| D.fuy | -----      | -----      | -----      | -----      | -----      |
| D.aur | -----      | -----      | -----      | -----      | -----      |
| D.obs | -----      | -----      | -----      | -----      | -----      |
| D.wil | atttttacaa | ttgttttggt | tccttctctt | tcaacaatgg | gtttattcat |
| D.sal | -----      | -----      | -----      | -----      | -----      |
| Z.ghe | -----      | -----      | -----      | -----      | -----      |
| D.vir | -----      | -----      | -----      | -----      | -----      |
| D.gri | -----      | -----      | -----      | -----      | -----      |
| D.mel | -----      | -----      | -----      | -----      | -----      |
| D.mau | -----      | -----      | -----      | -----      | -----      |
| D.sim | -----      | -----      | -----      | -----      | -----      |
| D.ere | -----      | -----      | -----      | -----      | -----      |
| D.fuy | -----TATT  | TAAAAAACAA | AACAtgttgt | atataaaaaa | cttcaattta |
| D.aur | -----      | -----      | -----      | -----      | -----      |
| D.obs | -----      | -----      | -----      | -----      | -----      |
| D.wil | ttatagTATT | AAAAAAAAAA | AACAacaaca | aatcgtATAA | TGCC-----  |
| D.sal | -----      | -----      | -----      | -----      | -----      |
| Z.ghe | -----      | -----      | -----      | -----      | -----      |
| D.vir | -----      | -----      | -----      | -----      | -----      |
| D.gri | -----      | -----      | -----      | -----ATAA  | GACT-----  |
| D.mel | -----      | -----      | -----      | -----      | -----      |
| D.mau | -----      | -----      | -----      | -----      | -----      |
| D.sim | -----      | -----      | -----      | -----      | -----      |
| D.ere | -----      | -----      | -----      | -----      | -----      |
| D.fuy | attttgatat | tttaatcaat | acttaaaaac | cctgaaagca | tgtttcaatt |
| D.aur | -----      | -----      | -----      | -----      | -----      |
| D.obs | -----      | -----      | -----      | -----      | -----      |
| D.wil | -----      | -----      | -----      | -----      | -----      |
| D.sal | -----      | -----      | -----      | -----      | -----      |
| Z.ghe | -----      | -----      | -----      | -----      | -----      |
| D.vir | -----      | -----      | -----      | -----      | -----      |
| D.gri | -----      | -----      | -----      | -----      | -----      |
| D.mel | -----      | -----      | -----      | -----      | -----      |
| D.mau | -----      | -----      | -----      | -----      | -----      |
| D.sim | -----      | -----      | -----      | -----      | -----      |
| D.ere | -----      | -----      | -----      | -----      | -----      |
| D.fuy | aatttgtaac | ttagtactac | atgaagtgat | gTAAAGATAT | GTCCGCATCG |
| D.aur | -----      | -----      | -----      | -TAAAGATAC | CACCGCATCG |

|       |            |             |            |            |            |
|-------|------------|-------------|------------|------------|------------|
| D.obs | -----      | -----       | -----      | -----      | -----      |
| D.wil | -----      | -----       | -----      | -----      | -----      |
| D.sal | -----      | -----       | -----      | -----      | -----      |
| Z.ghe | -----      | -----       | -----      | -----      | -----      |
| D.vir | -----      | -----       | -----      | -----      | -----      |
| D.gri | -----      | -----       | -----      | -----      | -----      |
|       |            |             |            |            |            |
| D.mel | -----      | -----       | -----      | -----      | ---TCGCAAA |
| D.mau | -----      | -----       | -----      | ---TGAG--- | ---TCGCAAA |
| D.sim | -----      | -----       | -----      | ---TGAC--- | ---TCCCAAA |
| D.ere | -----      | -----       | -----      | CCGTGGG--- | ---TCCCAAA |
| D.fuy | ATTTTCCAGA | aaccocctttc | atcccctttc | CCTTGAC--- | ---ACCCCAA |
| D.aur | ATTTTCCAGA | gagaccocct  | tgtcagccca | cattcccctt | aatTCCCTTA |
| D.obs | -----      | -----       | -----      | -----      | -----      |
| D.wil | -----      | -----       | -----      | -----      | -----      |
| D.sal | -----      | -----       | -----      | -----      | -----      |
| Z.ghe | -----      | -----       | -----      | -----      | -----      |
| D.vir | -----      | -----       | -----      | -----      | -----      |
| D.gri | -----      | -----       | -----      | -----      | -----      |
|       |            |             |            |            |            |
| D.mel | GTCACATATT | TGTTCTTTTA  | TAACATGAA- | ---CGCGTAC | C-----     |
| D.mau | GTCACATATT | TGTTCTTTTA  | TAACGCGAA- | ---CGCGTAC | C-----     |
| D.sim | GTCACATATT | TGTTCTTTTA  | TA-----    | -----Ac    | gtgaacgagt |
| D.ere | GTCACATATT | TGTTCTTTTA  | TA-----    | -----AC    | C-----     |
| D.fuy | GCCTCATGTT | TGTTATTTTA  | CAACGTCa   | cgtCGCGAAC | C-----     |
| D.aur | GCCAAATGTT | TGTTATTTTA  | TAACGTCAA- | ---CGCGTcg | cgaaccgaga |
| D.obs | -----      | -----       | -----      | -----      | -----      |
| D.wil | -----      | -----       | -----      | -----      | -----      |
| D.sal | -----      | -----       | -----      | -----      | -----      |
| Z.ghe | -----      | -----       | -----      | -----      | -----      |
| D.vir | -----      | -----       | -----      | -----      | -----      |
| D.gri | -----      | -----       | -----      | -----      | -----      |
|       |            |             |            |            |            |
| D.mel | -----GCGA  | AGGCCCCATA  | AAGTGTTCG- | -----      | -CAATAAAAT |
| D.mau | -----GCGA  | AGGTCCCATA  | AAGTGTTCG- | -----      | -TAATAAAAT |
| D.sim | accgcgGCGA | AGGTCCCATA  | AAGTGTTCG- | -----      | -TAATAAAAT |
| D.ere | -----GCGA  | ATGCCCCATA  | AAGTGTTCG- | -----      | -TAATAAAAT |
| D.fuy | -----GAGA  | AGGTCTCATA  | AAGTGTTCG- | -----      | -TAATAAAAT |
| D.aur | aggc-----  | ---CCCCATA  | AAGTGTTCG- | -----      | -TAATAAAAT |
| D.obs | -----      | ---CCAATA   | AAATGTTTTG | CTATAAAATa | cAATATATAT |
| D.wil | -----      | ---ACTCATA  | AAATGTTTC- | -----      | -TAATATATT |
| D.sal | -----      | -----       | -----      | -----      | -----      |
| Z.ghe | -----      | ---CTCATA   | AAATGTTTGG | CAATAAAAT- | -----TAT   |
| D.vir | -----      | -----       | ---TTCT-   | -----      | -AATAAATAT |
| D.gri | -----      | ---CCTCATA  | AAGTGTTCG- | -----      | -CAATAAAAT |
|       |            |             |            |            |            |
| D.mel | ATATTGTGCA | ATAGTTA---  | ----TAcagc | cactcatata | cat-----   |

|       |            |            |            |            |            |
|-------|------------|------------|------------|------------|------------|
| D.mau | ATATTGTGCA | ATATTTGTGC | TATAGTTA-- | -----      | ---TACA--- |
| D.sim | ATATTGTGCA | ATATTTGTGC | TATAGTTA-- | -----      | ---TACA--- |
| D.ere | ATATTGCGCA | ATATTTGTGC | TATAGTTA-- | -----      | ---TACA--- |
| D.fuy | ATATTGTaca | atatttg-GC | TATAGTTA-- | -----      | ---TATA--- |
| D.aur | ATATTGTgca | atatttt-GC | TATAGTTA-- | -----      | ---TAGA--- |
| D.obs | TGTTTGTCCA | ATATATT--- | ----GTTA-- | -----      | ---TATA--- |
| D.wil | acgccataat | tttttttttt | ttgctttggt | ttagttctat | tgaTATT--- |
| D.sal | -----      | -----      | -----      | -----      | -----      |
| Z.ghe | ATATTGTGCA | ATATATT--- | ----AATA-- | -----      | ---TATTTTt |
| D.vir | ATATTGTGCA | ATATATA--- | ----TATT-- | -----      | ---TTTTTTt |
| D.gri | ATATgcatat | atattgtgaa | att-----   | -----      | -----      |

|       |            |            |            |            |            |
|-------|------------|------------|------------|------------|------------|
| D.mel | -----      | -----      | -----      | -----      | -----      |
| D.mau | -----      | -----      | GCCACTC--- | -----      | -----      |
| D.sim | -----      | -----      | GCCACTC--- | -----      | -----      |
| D.ere | -----      | -----      | GCCACTC--- | -----      | -----      |
| D.fuy | -----      | -----      | GCCACTC--- | -----      | -----      |
| D.aur | -----      | -----      | GCCACTC--- | -----      | -----      |
| D.obs | -----      | -----      | TGCCCCA--- | -----      | -----      |
| D.wil | -----      | -----      | CCCACAA--- | -----      | -----      |
| D.sal | -----      | -----      | -----      | -----      | -----      |
| Z.ghe | gtgtgcccac | tctatataag | GCCCCTA--- | -----      | -----      |
| D.vir | tgcccgaacg | tatatctcac | gggccaaatg | tttatcggcc | tggcaTATAT |
| D.gri | -----      | -----      | -----      | -----      | ----TATAT  |

|       |            |            |             |            |            |
|-------|------------|------------|-------------|------------|------------|
| D.mel | ---TATATAC | AATATATATA | TATGTGgATG  | TGTATGTGCA | CAACC----- |
| D.mau | ---ATATAC  | ATTATATATA | CATATGtgt-  | -----      | -----      |
| D.sim | ---ATATAC  | ATTATATATA | TATGC-----  | -----      | -----      |
| D.ere | ---ATATAC  | ATTATATACT | T-----ATG   | TGTATGTGCG | CAACT----- |
| D.fuy | ---ATATAC  | ATTATATATA | TATGagc---  | ---G-----  | CAACT----- |
| D.aur | ---ATATAC  | ATTATATATA | TATATAAAATg | tggG-----  | CAACT----- |
| D.obs | ---ATATAC  | ATTATATAGA | CAacgcacac  | acacacacac | acactgcata |
| D.wil | ---TGGAGA  | TGTGTATATA | C-----TTA   | TGTATATATA | TTTAT----- |
| D.sal | -----      | -----      | -----       | -----      | -----      |
| Z.ghe | ---ATATCG  | TTTATATATA | TATAT-----  | -----      | -----      |
| D.vir | ATAAATATGT | ATTATATATA | TACGC-----  | -----      | -----      |
| D.gri | ATATATATAT | ATTATACATA | TATCTAAATa  | aatattaggc | caactgttta |

|       |            |            |             |            |            |
|-------|------------|------------|-------------|------------|------------|
| D.mel | -----      | -----      | -----       | --ATATAGAT | GTGTTGTATA |
| D.mau | -----      | -----      | -----       | -TATATAGAT | GTGTTGTATA |
| D.sim | -----      | -----ATGT  | GTGTGTGTAA  | CTATATAGAT | GTGTTGTATA |
| D.ere | -----      | -----      | -----       | --ATATAGAT | G---TGTATA |
| D.fuy | -----      | -----      | -----       | --ATATAGAT | G---TGTATA |
| D.aur | -----      | -----      | -----       | --ATATAAAT | G---TGTATA |
| D.obs | ctatgtatgt | aactattata | acgggggtaca | catatacgca | gcccccttac |
| D.wil | -----      | -----      | -----       | --ATATACTT | A---TATATA |
| D.sal | -----      | -----      | -----       | -----      | -----      |

Z.ghe ----- -----CTTA TATATGCATA tcttctcttg tttggcatag  
D.vir ----- -----AATA TATATTTATA agcaagtatg gca-----  
D.gri ttgccattgt gtagatGTGT GTGTGTGTGT TTAAGTAGAT ATGGGAAATG

D.mel TAAAT--TGC CATC----- --CCATTGCT TATCATCGCC TTTATAGGTA  
D.mau TAAAT--TGC CATC----- --CCATTGCT TATCACCGCC TTTATAGGTA  
D.sim TAAAT--TGC CATC----- --CCATTGCT TATCATCGCC TTTATAGGTA  
D.ere TAAAT--TGC CATA----- --CCATTGCT T---ATCGCC TTTATAGGTA  
D.fuy TATAgaagg- -----CTG TCCCACTGCT T---ATCGCC TTTATAGGTA  
D.aur TATATatTGC CATG----- --CCATTGCT T---ATCGCC TTTATAGGTA  
D.obs tccttccact tttgtttttc cattgcctct tatcgcattt ttgttatttt  
D.wil TAAGT--ATA CATatttCTA TCTTATTGCT T---ATCGCT TTTATTGGTt  
D.sal -----  
Z.ghe tgggtagaat tcGTA-----  
D.vir -----AA T-GTA-----  
D.gri AGAATgagAA T-GTA-----

D.mel G----- --AATGTAAT TTCTTTTTAT GCGCCGTTTT G  
D.mau G----- --AATGTAAT TTCGTTTTAT GCGCCGTTTT G  
D.sim G----- --AATGTAAT TTGGTTTTAT GCGCCGTTTT G  
D.ere G----- --AATGTAAT TTCGTTTTAT GCGCAGTTTT G  
D.fuy G----- --AATGTAAT TTCTTTTTAT GTGCAGTTTT G  
D.aur G----- --AATGTAAT TTCGTTTTAT GCGCAGTTTT G  
D.obs ctataggtag aaAATGTAAT TTCGTTTTAT GCGCAGTTTT G  
D.wil tgaatgtata tT--**TGTAAT TTCGTTTTAT GTGCCGTTTT G**  
D.sal -----  
Z.ghe ----- -T--TGTAAT TTGTTTTTAT GCGCAGTTTT G  
D.vir ----- -T--TGTAAT TTGTTTTTAT GCGCAGTTTT G  
D.gri ----- -T--CGTAAT TTGTTTTTAT GCGCAGTTTT G

<(dimorphic element wil large)

**Table S1. GFP-reporter screen for pupal cis-regulatory elements in the *D. melanogaster* *bab* locus**

| #  | Construct Name | Size (bp) | RE Site      | Primer Sequence                                                  | Abdominal Epidermis<br>Other Expression |
|----|----------------|-----------|--------------|------------------------------------------------------------------|-----------------------------------------|
| 1  | bab2 -12       | 6368      | KpnI<br>KpnI | ggtaccTCATCTTTCCGCTCCGTTAG<br>ggtaccTCTCCCAGTCGAATCCAGTT         | None                                    |
| 2  | bab2 -7        | 6330      | FseI<br>SbfI | ggccggccCGAAGCAACACACTCACAA<br>cctgcaggGGAAAACGGAGACCAACACA      | None                                    |
| 3  | bab2 -2        | 4051      | FseI<br>SbfI | ggccggccACAATGGTGGAGGTGGTCAT<br>cctgcaggGCCCTCTTACGGCACTTTTA     | None                                    |
| 4  | bab2 +2        | 3727      | NheI<br>SbfI | gctagcGTCCCTCTCCACGAGTCATC<br>cctgcaggCATGACCACCTCCACCATT        | None<br>(Oenocyte)                      |
| 5  | bab2 +7        | 6108      | SbfI<br>FseI | cctgcaggGTGGGGCTTCATGGTCTAAA<br>ggccggccGCAGTGA CTGCTGAATTTG     | None<br>bristle/muscle                  |
| 6  | bab2 +23       | 5313      | SbfI<br>FseI | cctgcaggAGCCGGAGAAGAAAGGCTAC<br>ggccggccATTATTAATCAATGATCTGTTACA | None                                    |
| 7  | bab2 +28       | 6143      | SbfI<br>FseI | cctgcaggTCCACAGCCATAACCTTTTACA<br>ggccggccTTTAGACCCTGCCTGGACTG   | None                                    |
| 8  | bab2 +32       | 6533      | SbfI<br>FseI | cctgcaggAGATGGCTAACGGCAGAGTG<br>ggccggccCCATAGAAGGGAAACTTTACGA   | None                                    |
| 9  | bab2 +38       | 6463      | SbfI<br>FseI | cctgcaggGTCCGTTCCCTCCAGTCCTCT<br>ggccggccAGGAACAATGGCTCGAAAGA    | None                                    |
| 10 | bab2 +42       | 6360      | NheI<br>SbfI | gctagcTGAGGGGCAAATTATGGAGA<br>cctgcaggGTGGGTGCTGCTGTTCCCT        | None<br>Tarsal Segments                 |
| 11 | bab2 +47       | 6325      | NheI         | gctagcAGAAGCGGCCAAACAAAAG                                        | None                                    |

|    |               |       |              |                                                                        |                            |
|----|---------------|-------|--------------|------------------------------------------------------------------------|----------------------------|
|    |               |       | KpnI         | ggtaccGCGCCTAACTAGCCAACAAT                                             | Tarsal Segments            |
| 12 | bab2 +52      | 6674  | SbfI<br>FseI | cctgcaggCTTTGACGATGAGGGGATGT<br>ggccggccGAGTCCTGCATCGAGAATCC           | None                       |
| 13 | bab2 +58      | 6246  | FseI<br>KpnI | ggccggccTTCCAGTTCCACTCCCCTC<br>ggtaccGCGGGGACACAGTTAGCA                | None                       |
| 14 | bab2 +63      | 6189  | SbfI<br>FseI | cctgcaggCCCTTCCACCCTTTCACC<br>ggccggccCAAACGCAGGCAAACAATC              | None                       |
| 15 | bab2 +67      | 6467  | SbfI<br>FseI | cctgcaggTGAATGCACTGGCAGAAAAC<br>ggccggccCCCTCTTGATTTCCCATCCT           | None                       |
| 16 | bab2 +72      | 6047  | SbfI<br>FseI | cctgcaggGAGGGGAAAACGGGAATCT<br>ggccggccGCTTCAGCAGCAACAGCAT             | None                       |
| 17 | bab1 intron 1 | 15361 | AscI<br>SbfI | ggcgcgccTGCTTCTGCCGTTTCGTCTGGAGT<br>cctgcaggCCGAGAGGAAGAAAGGGTGAGTGA   | Male A2-A4<br>Female A2-A7 |
| 18 | bab1 intron 2 | 14894 | AscI<br>SbfI | ggcgcgccCAAGTGATAAGTGCTCCAGGGGAATG<br>cctgcaggTCGAGTGCAGGGACAGATGACGAT | Female A5-A7               |
| 19 | bab1 intron 3 | 11111 | KpnI<br>KpnI | AAACGCATAAATATAAAAACGCGTTG<br>CATTCTCGGAATTATTCGCGAA                   | None                       |
| 20 | bab1 intron 4 | 9435  | NotI<br>NotI | AAGACGCGATAAGACGCGATT<br>GGTAAATATTTTTAATACGCGTCGCAT                   | None                       |



**Table S2. Identification of the minimal sequence necessary for dimorphic and anterior CRE activity**

| #  | Construct Name             | Size(bp) | RE Site      | Primer Sequence                                                     | Observed Expression         |
|----|----------------------------|----------|--------------|---------------------------------------------------------------------|-----------------------------|
| 21 | bab1 intron 6              | 7217     | AscI<br>SbfI | ggcgcgccCATCGCATCCCCTGCTCGTATCT<br>cctgcaggTCGAGTGCAGGGACAGATGACGAT | Female A5-A7<br>(strong)    |
| 22 | bab1 intron 7              | 4263     | KpnI<br>NheI | ggtaccTTTCTCCGTTTCTACGAACGTGTTC<br>gctagcGCAATAAAATAAAAGAACCGATGCGA | Female A5-A7<br>(strong)    |
| 23 | dimorphic element          | 663      | KpnI<br>NheI | ggtaccCTCGCTCTTTCTCTTTGCCATTTT<br>gctagcTTGTGCTCATAAGCGGATTAGCGA    | Female A5-A7<br>(strong)    |
| 24 | dimorphic element (Left)   | 382      | KpnI<br>NheI | ggtaccCTCGCTCTTTCTCTTTGCCATTTT<br>gctagcACTACCACAATTAACTTGCGCAA     | Female A6-A7<br>(weak)      |
| 25 | dimorphic element (Middle) | 450      | KpnI<br>NheI | ggtaccGCAACATTCGCAGAACAGCAGC<br>gctagcCTGCTGGAGCAAATCTAAGCATGT      | Female A6-A7<br>(weak)      |
| 26 | dimorphic element (Right)  | 356      | KpnI<br>NheI | ggtaccCGTGGCAAAGTGGAGTGGACTG<br>gctagcTTGTGCTCATAAGCGGATTAGCGA      | Female A6-A7<br>(very weak) |
| 27 | bab1 intron 8              | 6986     | AscI<br>SbfI | ggcgcgccTGATGACGCCGAGTATGCCGA<br>cctgcaggGTGGAGTTCATGTATCGCGGC      | monomorphic A2-A4           |
| 28 | bab1 intron 9              | 7067     | AscI<br>SbfI | ggcgcgccTCGTCATCTGTCCCTGCACTCG<br>cctgcaggGTAATCAATGCCACATCCCGC     | bristle/muscle              |
| 29 | bab1 intron 10             | 2237     | KpnI<br>NheI | ggtaccGGACCACGACGACTGACACTTATC<br>gctagcCCGAGAGGAAGAAAGGGTGAGTGA    | monomorphic A2-A4           |
| 30 | bab1 intron 11             | 1916     | KpnI<br>NheI | ggtaccTCCTCTTTCCCGATTCTCACCT<br>gctagcACTGCGACTGCATTAGCACCGA        | monomorphic A2-A4           |
| 31 | bab1 intron 12             | 1256     | KpnI<br>NheI | ggtaccTCCTCTTTCCCGATTCTCACCT<br>gctagcTTCTCTCATTTCCCATCACCG         | No Activity                 |

32 anterior  
element

1357

KpnI  
NheI

ggtaccGTGAACTGATCGAGAAGCTGGAGAG  
gctagcACTGCGACTGCATTAGCACCGA

monomorphic A2-A4

**Table S3. Summary of the Activity of Mutant Dimorphic Elements**

| <b>Construct</b>      | <b>Description</b>                               | <b>% Activity Female/Male</b> |
|-----------------------|--------------------------------------------------|-------------------------------|
| mel                   | (wild-type)                                      | 100±2% (4) / 20±3% (4)        |
| mel/+                 | (transgene heterozygote)                         | 59±2% (5) / ND                |
| mel TTAT KO           | (15 TTAT sites mutated)                          | 9±0% (3) / ND                 |
| mel TTTAT KO          | (7 TTTAT sites mutated)                          | 19±2% (3) / ND                |
| mel TTTAC KO          | (7 TTTAC sites mutated)                          | 26±3% (3) / ND                |
| mel 9,10 KO           | (sites 9 & 10 mutated)                           | 110±7% (3) / ND               |
| mel 11-13KO           | (sites 11-13 mutated)                            | 79±4% (3) / ND                |
| mel 9-12,14 KO        | (sites 9-12 & 14 mutated)                        | 26±6% (3) / ND                |
| mel 6,7,9-11,13,14 KO | (sites 9-11, 13 & 14 mutated)                    | 30±4% (3) / ND                |
| mel Dsx1 KO           | (Dsx site 1 mutated)                             | 23±2% (3) / 29±3% (3)         |
| mel Dsx2 KO           | (Dsx site 2 mutated)                             | 34±3% (3) / 21±3% (4)         |
| mel Dsx1,2 KO         | (Dsx sites 1 & 2 mutated)                        | 24±1% (2) / 53±3% (3)         |
| mel 8 KO              | (site 8 mutated)                                 | 78±5% (2) / ND                |
| mel 13 KO             | (site 13 mutated)                                | 104±4% (4) / ND               |
| mel 14 KO             | (site 14 mutated)                                | 55±0% (3) / ND                |
| mel Dsx1 wil          | (Dsx site 1 converted to D. wil site)            | 87±2% (4) / ND                |
| mel Dsx1 wil 8,13 KO  | (Dsx1 wil conversion + sites 8 & 13 mutated)     | 66±3% (3) / ND                |
| wil                   | (D. wil dimorphic element)                       | 1±1% (2) / ND                 |
| wil Dsx1 WT           | (D. wil Dsx site 1 converted to D. mel)          | 34±3% (3) / ND                |
| mel ins I             | (58 bp of D. wil added to region I of D. mel)    | 62±3% (3) / ND                |
| mel ins II            | (98 bp of D. wil added to region II of D. mel)   | 41±3% (3) / ND                |
| mel ins III           | (57 bp of D. wil added to region III of D. mel)  | 137±3% (3) / ND               |
| mel ins I-III         | (58,98 and 57bp added to region I-III of D. mel) | 44±4% (3) / ND                |

NOTES: For each construct, the mean for A6 intensity and standard error of the mean was determined using images from multiple independent samples from the same transgenic line. The percent of wild-type activity was calculated as: (construct A6 mean/A6 mean of wild-type dimorphic element in female pupae) X 100 and reported above with the standard error of the mean (± SEM) and number of replicates (N).

**Table S4. Oligonucleotide sequences used in EMSAs**

| <b>Binding Site</b> | <b>Orientation</b> | <b>Sequence</b>                        |
|---------------------|--------------------|----------------------------------------|
| Dsx 1               | Top                | TTTTGGCCGCAACAATGTTGCTGCATTTA          |
|                     | Bottom             | TTAAATGCAGCAACATTGTTGCGGCCAAA          |
| Dsx 1 KO            | Top                | TTTTGGCCGCAAGGGGGCGTGCTGCATTTA         |
|                     | Bottom             | TTAAATGCAGCACGCCCCCTGCGGCCAAA          |
| Dsx 2               | Top                | TTTCCCAGCACACAACAATGTTGCGGCATTC        |
|                     | Bottom             | TGAATGCCGCAACATTGTTGTGCTGGGAA          |
| Dsx 2 KO            | Top                | TTTCCCAGCACAGGGGGCGTGCGGCATTC          |
|                     | Bottom             | TGAATGCCGCACGCCCCCTGTGCTGGGAA          |
| Dsx 1 wil           | Top                | TTTTGGCCGCAACATTGTGGCTGCATTTA          |
|                     | Bottom             | TTAAATGCAGCCACAATGTTGCGGCCAAA          |
| Site 1,2            | Top                | TTTTAACTTTTATTACTCTTAATATAAAAAAGCT     |
|                     | Bottom             | TAGCTTTTTTTATATTAAGAGTAATAAAAAGTTAAA   |
| Site 4              | Top                | TTGCACGCGGTCATAAAAAGTTGCAGGA           |
|                     | Bottom             | TTCTGCAACTTTTTATGACCGCGTGCA            |
| Site 4 KO           | Top                | TTGCACGCGGTCgccgAAAGTTGCAGGA           |
|                     | Bottom             | TTCTGCAACTTTTcggcGACCGCGTGCA           |
| Site 8              | Top                | TGCTAGTGGCACATAAAAATTGCGCAA            |
|                     | Bottom             | TTTGCGCCAATTTTTATGTGCCACTAGC           |
| Site 8 KO           | Top                | TGCTAGTGGCACgccgAAATTGCGCAA            |
|                     | Bottom             | TTTGCGCCAATTTTcggcGTGCCACTAGC          |
| Site 11,12          | Top                | TTCGCACTTTACGAGGCGTTTTTTTTTTTATATCACT  |
|                     | Bottom             | TAGTGATATAAAAAAAAAAACGCCTCGTAAAGTGCGA  |
| Site 11,12 [m11]    | Top                | TTCGCACTcggCGAGGCGTTTTTTTTTTTATATCACT  |
|                     | Bottom             | TAGTGATATAAAAAAAAAAACGCCTCGcggAGTGCGA  |
| Site 11,12 [m12]    | Top                | TTCGCACTTTACGAGGCGTTTTTTTTTcggcATCACT  |
|                     | Bottom             | TAGTGATgccgAAAAAAAAAACGCCTCGTAAAGTGCGA |
| Site 13             | Top                | TTATCACTTACTTTACTTAGTTGATTA            |
|                     | Bottom             | TTAATCAACTAAGTAAAGTAAGTGATA            |
| Site 13 KO          | Top                | TTATCACTTACTcggCTTAGTTGATTA            |
|                     | Bottom             | TTAATCAACTAAGcggAGTAAGTGATA            |
| Site 14             | Top                | TGTGGGCTGCATTTTACGACCCTCAAAA           |
|                     | Bottom             | TTTTTGAGGGTCGTAAAATGCAGCCCAC           |
| Site 14 KO          | Top                | TGTGGGCTGCATTcggCGACCCTCAAAA           |
|                     | Bottom             | TTTTTGAGGGTCGcggAATGCAGCCCAC           |
